# Supplementary material for: Genomic and molecular characterisation of Escherichia marmotae from wild rodents in Qinghai-Tibet plateau as a potential pathogen
Source: PubMed Central journal article supplement (PMC6650469; doi:10.1038/s41598-019-46831-3), 2019-07-23
Supplement: 41598_2019_46831_MOESM1_ESM.pdf [file 41598_2019_46831_MOESM1_ESM.pdf]

# **Genomic and molecular characterisation of *Escherichia marmotae* from wild rodents in Qinghai-Tibet plateau as a potential pathogen**

Sha Liu<sup>1,4,#</sup>, Jie Feng<sup>2,#</sup>, Ji Pu<sup>1,#</sup>, Xuefang Xu<sup>1,#</sup>, Shan Lu<sup>1,#</sup>, Jing Yang<sup>1</sup>, Yiting Wang<sup>1</sup>, Dong Jin<sup>1</sup>, Xiaochen Du<sup>2</sup>, Xiangli Meng<sup>1</sup>, Xia Luo<sup>1</sup>, Hui Sun<sup>1</sup>, Yanwen Xiong<sup>1</sup>, Changyun Ye<sup>1</sup>, Ruiting Lan<sup>3,\*</sup> and Jianguo Xu<sup>1,5,\*</sup>

1 State Key Laboratory of Infectious Disease Prevention and Control, Collaborative Innovation Center of Diagnosis and Treatment of Infectious Diseases, National Institute of Communicable Disease Control and Prevention , Chinese Center of Disease Control and Prevention, Beijing 102206, China

2 Institute of Microbiology, Chinese Academy of Sciences, No.1 Beichen West Road, Beijing 100101, China

3 School of Biotechnology and Biomolecular Sciences, University of New South Wales, Sydney, New South Wales, Australia

4 Department of Medical Microbiology and Parasitology, School of Basic Medical Sciences, Capital Medical University, Beijing 100069, China

5 Shanghai Institute of Emerging and Re-emerging infectious diseases, Shanghai Public Health Clinical Center, 201508, China.

\*: Corresponding authors

Prof Jianguo Xu, xujianguo1@icdc.cn; Prof Ruiting Lan, r.lan@unsw.edu.au

#: those authors contributed equally

# Supplemental Material

A

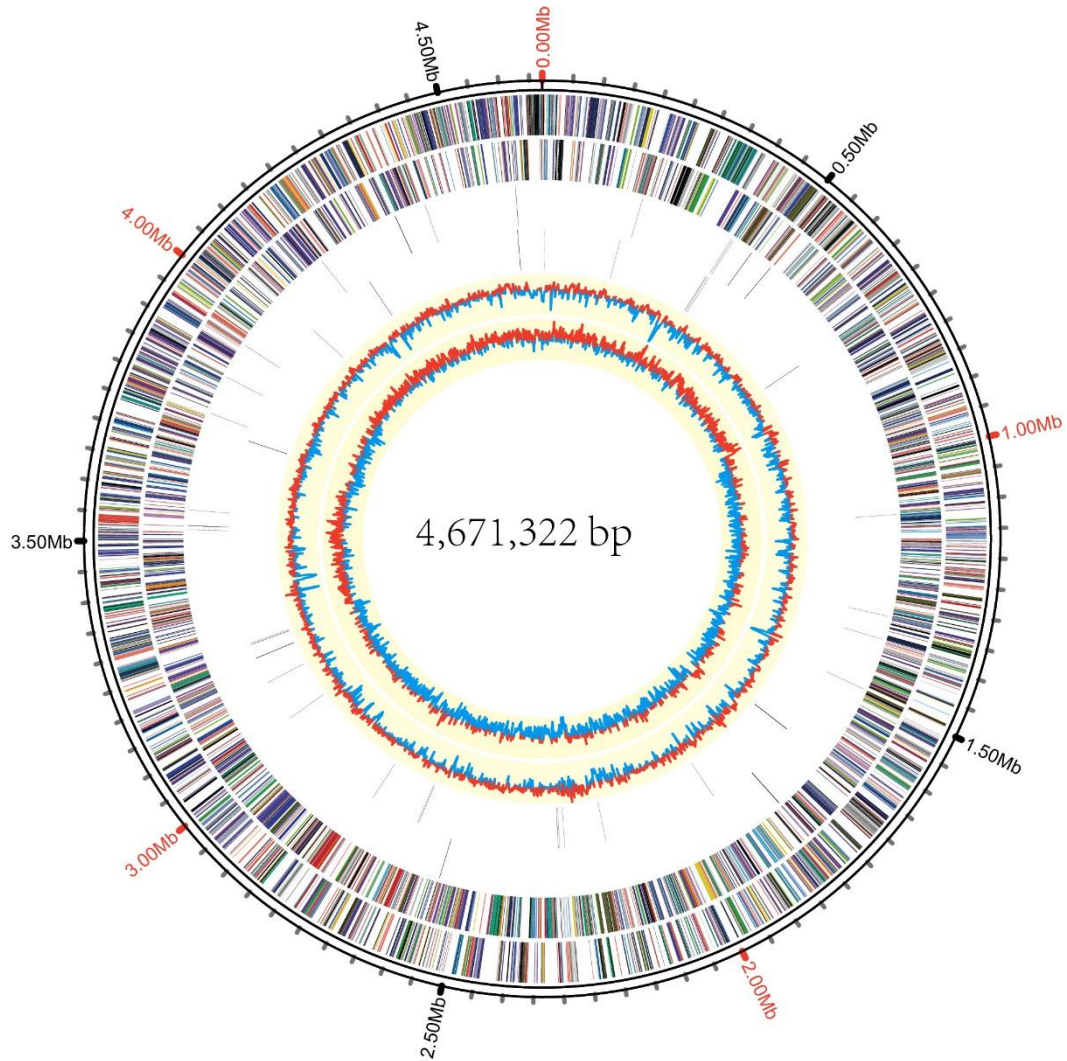

| Metabolism                                                                                                                                                                                                                                                                                                                                                                                                                                                                                           | Cell processing & signaling                                                                                                                                                                                                                                                                                                                                                                                                                                                                                                                         | Information storage & processing                                                                                                                                                                                                                                                                   |
|------------------------------------------------------------------------------------------------------------------------------------------------------------------------------------------------------------------------------------------------------------------------------------------------------------------------------------------------------------------------------------------------------------------------------------------------------------------------------------------------------|-----------------------------------------------------------------------------------------------------------------------------------------------------------------------------------------------------------------------------------------------------------------------------------------------------------------------------------------------------------------------------------------------------------------------------------------------------------------------------------------------------------------------------------------------------|----------------------------------------------------------------------------------------------------------------------------------------------------------------------------------------------------------------------------------------------------------------------------------------------------|
| <ul style="list-style-type: none"> <li>■ [C] Energy production &amp; conversion</li> <li>■ [G] Carbohydrate transport &amp; metabolism</li> <li>■ [E] Amino acid transport &amp; metabolism</li> <li>■ [F] Nucleotide transport &amp; metabolism</li> <li>■ [H] Coenzyme transport &amp; metabolism</li> <li>■ [I] Lipid transport &amp; metabolism</li> <li>■ [P] Inorganic ion transport &amp; metabolism</li> <li>■ [Q] Secondary metabolites biosynthesis, transport &amp; catabolism</li> </ul> | <ul style="list-style-type: none"> <li>■ [D] Cell cycle control, cell division, chromosome partitioning</li> <li>■ [Y] Nuclear structure</li> <li>■ [V] Defense mechanisms</li> <li>■ [T] Signal transduction mechanism</li> <li>■ [M] Cell wall/membrane/envelope biogenesis</li> <li>■ [N] Cell motility</li> <li>■ [Z] Cytoskeleton</li> <li>■ [W] Extracellular structures</li> <li>■ [U] Intracellular trafficking, secretion &amp; vesicular transport</li> <li>■ [O] Posttranslational modification, protein turnover, chaperones</li> </ul> | <ul style="list-style-type: none"> <li>■ [J] Translation, ribosomal structure &amp; modification</li> <li>■ [A] RNA Processing &amp; modification</li> <li>■ [K] Transcription</li> <li>■ [L] Replication, recombination &amp; repair</li> <li>■ [B] Chromatin structure &amp; dynamics</li> </ul> |
| <b>Poorly characterized</b>                                                                                                                                                                                                                                                                                                                                                                                                                                                                          |                                                                                                                                                                                                                                                                                                                                                                                                                                                                                                                                                     |                                                                                                                                                                                                                                                                                                    |
| <ul style="list-style-type: none"> <li>■ [R] General function prediction only</li> <li>■ [S] Function unknown</li> <li>■ [X] No COG assignment</li> </ul>                                                                                                                                                                                                                                                                                                                                            |                                                                                                                                                                                                                                                                                                                                                                                                                                                                                                                                                     |                                                                                                                                                                                                                                                                                                    |

**B**

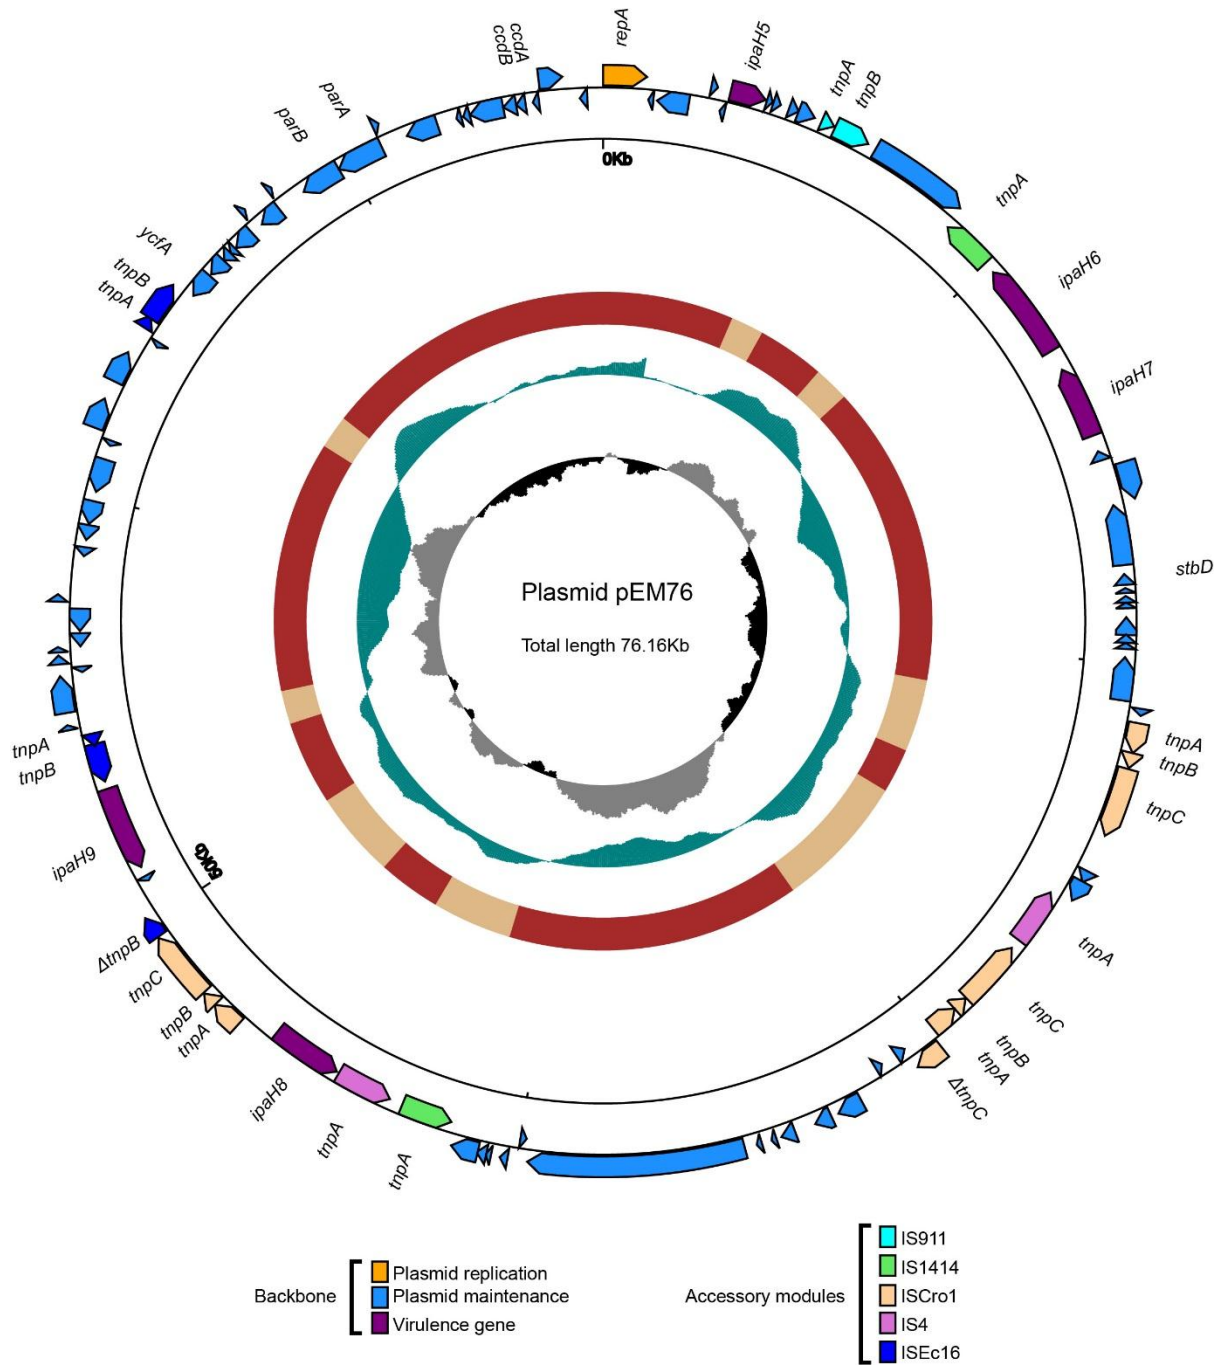

**Fig S1 Circular representation of the HT073016 chromosome and plasmid pEM76**

(A) Circular representation of the HT073016 chromosome. Circles range from 1 (outer circle) to 7 (inner circle). Circle 1, scale marks of the genome (0.5Mbp), Circles 2 and 3, protein-coding genes on the forward strand and reverse strand respectively. Circles 4 and 5, tRNA

(black) and rRNA (red) genes on the forward strand and reverse strand respectively. Circle 6, G + C content with a window size of 10 kb. Circle 7, GC skew ( $G \pm C/G + C$ ). Protein-coding genes are color coded according to their COG categories.

(B) Circular representation of plasmid pEM76. From the outside in: circle 1 represents genes on the positive and negative strands (scale is marked in 50 kb), circle 2 shows a plot of GC content (higher values outward), circle 3 shows a plot of GC skew ( $(G-C)/(G+C)$ ), respectively.

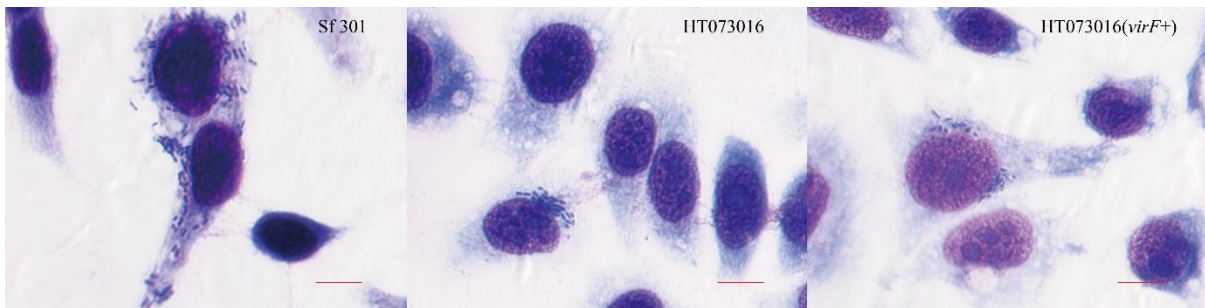

**Fig S2 Invasion of epithelial cells by *E. marmotae* and *E. marmotae* (*virF*<sup>+</sup>) *in vitro*.** HEp-2 cell invasion by *E. marmotae* HT073016, *E. marmotae* (*virF*<sup>+</sup>), *S. flexneri* str. 301 (positive control) and *E. coli* HB101 (negative control, not showed) as labelled. Infected HEp-2 cells were fixed by methanol and then stained with Geimsa.

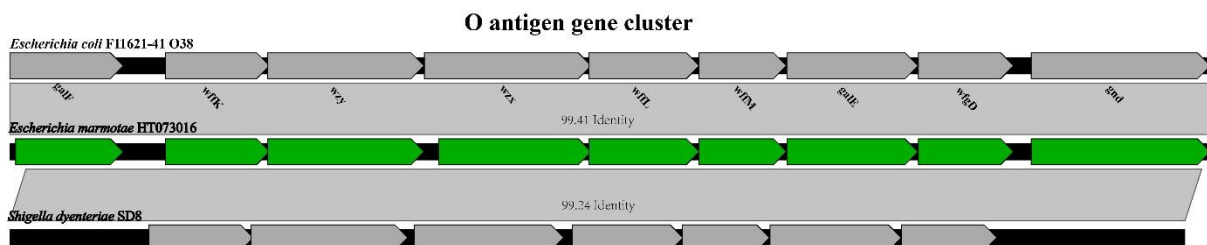

**Fig S3 Graphic representation of O-antigen gene cluster of *E. marmotae* HT073016 in comparison with the related strains: type 38 O-antigen of *E. coli* F11621 (top) and type 8**

O-antigen of *S. dysenteriae* (below)

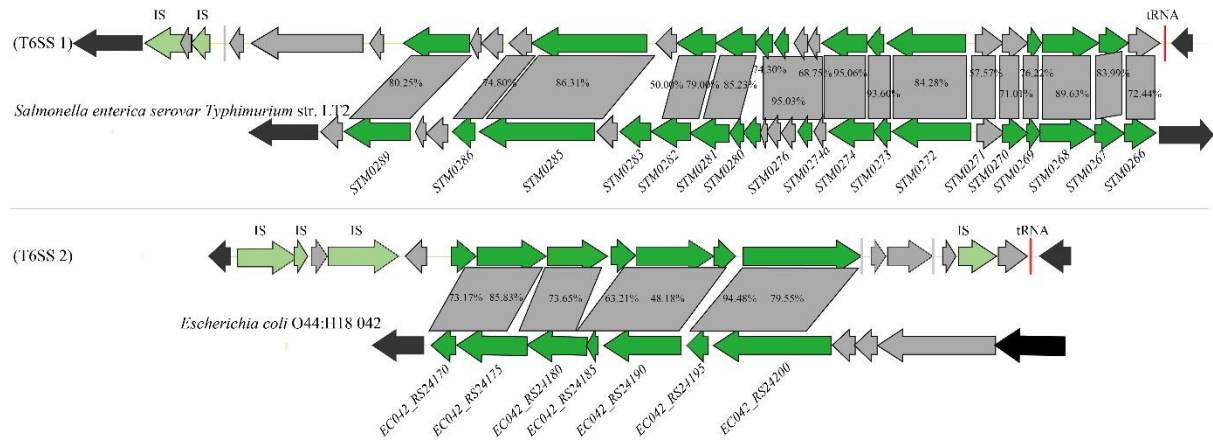

**Fig S4 Diagram showing the genetic organization of the type VI secretion system (T6SS) gene cluster of *E. marmotae* HT073016 compared to the T6SS clusters of *Salmonella enterica* serovar Typhimurium str. LT2 and enteroaggregative *E. coli* (EAEC) strain O42.** Shown in green are the genes of T6SS of *E. marmotae* HT073016. Genes in gray color are hypothetical protein. Genes in dark green color are transposase. Genes in blue color are T6SS of the other strains. Genes in black exhibit other functional genes. Regions in light gray indicate homologous sequences in % identity between two homologous genes at the nucleotide level.

**Table S1 The gene lists of plasmid pEM148 in *E. marmotae* HT073016**

|     | <b>start</b> | <b>stop</b> | <b>strand</b> | <b>locus-tag</b> | <b>product</b>                                 |
|-----|--------------|-------------|---------------|------------------|------------------------------------------------|
| CDS | 1            | 696         | +             | C1192_23870      | RepB family plasmid replication initiator      |
| CDS | 1648         | 3330        | +             | C1192_23875      | E3 ubiquitin--protein ligase                   |
| CDS | 3642         | 3958        | +             | C1192_23880      | IS3 family transposase                         |
| CDS | 3997         | 5205        | -             | C1192_23885      | IS256 family transposase                       |
| CDS | 5279         | 6115        | +             | C1192_23890      | IS3 family transposase                         |
| CDS | 6330         | 7319        | -             | C1192_23895      | non-LEE encoded effector protein NleB          |
| CDS | 7324         | 7503        | -             | C1192_23900      | hypothetical protein                           |
| CDS | 7558         | 8352        | +             | C1192_23905      | ribonuclease                                   |
| CDS | 8966         | 10150       | +             | C1192_23910      | cysteine protease                              |
| CDS | 10747        | 11274       | +             | C1192_23915      | hypothetical protein                           |
| CDS | 11271        | 11878       | -             | C1192_23920      | hypothetical protein                           |
| CDS | 12871        | 13380       | +             | C1192_23925      | DUF2726 domain-containing protein              |
| CDS | 13590        | 14426       | +             | C1192_23930      | OspB                                           |
| CDS | 14648        | 15444       | -             | C1192_23935      | IS3 family transposase                         |
| CDS | 16232        | 16483       | +             | C1192_23940      | hypothetical protein                           |
| CDS | 16606        | 17058       | -             | C1192_23945      | lytic transglycosylase                         |
| CDS | 17550        | 17816       | +             | C1192_23950      | hypothetical protein                           |
| CDS | 17813        | 18963       | -             | C1192_23955      | IS3 family transposase                         |
| CDS | 19390        | 19962       | -             | C1192_23960      | type III effector                              |
| CDS | 20159        | 21309       | +             | C1192_23965      | IS3 family transposase                         |
| CDS | 21610        | 22158       | +             | C1192_23970      | IS630 family transposase                       |
| CDS | 22249        | 22986       | -             | C1192_23975      | IS66 family transposase                        |
| CDS | 23064        | 23402       | -             | C1192_23980      | IS66 family insertion sequence hypothetical    |
| CDS | 23396        | 23683       | -             | C1192_23985      | IS66 family insertion sequence hypothetical    |
| CDS | 23787        | 24275       | +             | C1192_23990      | IS630 family transposase                       |
| CDS | 24308        | 24593       | +             | C1192_23995      | IS110 family transposase                       |
| CDS | 24592        | 24773       | -             | C1192_24000      | IS110 family transposase                       |
| CDS | 24895        | 25401       | -             | C1192_24005      | IS256 family transposase                       |
| CDS | 25474        | 26205       | -             | C1192_24010      | phosphatase PAP2 family protein                |
| CDS | 26439        | 26629       | +             | C1192_24015      | IS1 family transposase                         |
| CDS | 26664        | 27182       | -             | C1192_24020      | hypothetical protein                           |
| CDS | 27342        | 27734       | +             | C1192_24025      | DUF4158 domain-containing protein              |
| CDS | 27654        | 27875       | -             | C1192_24030      | hypothetical protein                           |
| CDS | 28409        | 29194       | +             | C1192_24035      | IS630 family transposase                       |
| CDS | 29529        | 30737       | -             | C1192_24040      | IS256 family transposase                       |
| CDS | 30847        | 30954       | +             | C1192_24045      | hypothetical protein                           |
| CDS | 31025        | 32845       | -             | C1192_24050      | hypothetical protein                           |
| CDS | 33328        | 33882       | +             | C1192_24055      | ISNCY family transposase                       |
| CDS | 34064        | 34291       | +             | C1192_24060      | ISNCY family transposase                       |
| CDS | 34478        | 36424       | -             | C1192_24065      | DUF4116 domain-containing protein              |
| CDS | 37055        | 37306       | +             | C1192_24070      | type II toxin-antitoxin system Phd/YefM family |

**Table S1 The gene lists of plasmid pEM148 in *E. marmotae* HT073016**

|     |       |       |   |             |                                                  |
|-----|-------|-------|---|-------------|--------------------------------------------------|
| CDS | 37303 | 37557 | + | C1192_24075 | Txe/YoeB family addiction module toxin           |
| CDS | 37586 | 37843 | - | C1192_24080 | hypothetical protein                             |
| CDS | 38373 | 38909 | - | C1192_24085 | general secretion pathway protein                |
| CDS | 38896 | 40089 | - | C1192_24090 | type II secretion system protein GspL            |
| CDS | 40086 | 41063 | - | C1192_24095 | type II secretion system protein                 |
| CDS | 41063 | 41665 | - | C1192_24100 | type II secretion system protein GspJ            |
| CDS | 41662 | 42033 | - | C1192_24105 | type II secretion system protein GspI            |
| CDS | 42030 | 42593 | - | C1192_24110 | type II secretion system protein GspH            |
| CDS | 42597 | 43079 | - | C1192_24115 | type II secretion system protein GspG            |
| CDS | 43069 | 44292 | - | C1192_24120 | type II secretion system protein GspF            |
| CDS | 44292 | 45785 | - | C1192_24125 | type II secretion system protein GspE            |
| CDS | 45785 | 47845 | - | C1192_24130 | type II secretion system protein GspD            |
| CDS | 47875 | 48834 | - | C1192_24135 | type II secretion system protein GspC            |
| CDS | 48852 | 49262 | - | C1192_24140 | hypothetical protein                             |
| CDS | 49328 | 50137 | - | C1192_24145 | prepilin peptidase                               |
| CDS | 50329 | 54912 | - | C1192_24150 | DUF4092 domain-containing protein                |
| CDS | 55197 | 55904 | - | C1192_24155 | hypothetical protein                             |
| CDS | 56692 | 58647 | - | C1192_24160 | hypothetical protein                             |
| CDS | 59742 | 59984 | - | C1192_24165 | hypothetical protein                             |
| CDS | 59997 | 61025 | - | C1192_24170 | EscU/YscU/HrcU family type III secretion system  |
| CDS | 61033 | 61800 | - | C1192_24175 | EscT/YscT/HrcT family type III secretion system  |
| CDS | 61800 | 62060 | - | C1192_24180 | EscS/YscS/HrcS family type III secretion system  |
| CDS | 62074 | 62724 | - | C1192_24185 | EscR/YscR/HrcR family type III secretion system  |
| CDS | 62714 | 63046 | - | C1192_24190 | hypothetical protein                             |
| CDS | 63610 | 64518 | - | C1192_24195 | hypothetical protein                             |
| CDS | 64499 | 64894 | - | C1192_24200 | hypothetical protein                             |
| CDS | 64939 | 66231 | - | C1192_24205 | FliI/YscN family ATPase                          |
| CDS | 66235 | 66636 | - | C1192_24210 | hypothetical protein                             |
| CDS | 66648 | 68708 | - | C1192_24215 | EscV/YscV/HrcV family type III secretion system  |
| CDS | 68721 | 69794 | - | C1192_24220 | YopN family type III secretion system gatekeeper |
| CDS | 69814 | 71511 | - | C1192_24225 | EscC/YscC/HrcC family type III secretion system  |
| CDS | 71498 | 72130 | - | C1192_24230 | transcriptional regulator                        |
| CDS | 72257 | 72679 | - | C1192_24235 | hypothetical protein                             |
| CDS | 72663 | 73070 | - | C1192_24240 | hypothetical protein                             |
| CDS | 73045 | 73743 | - | C1192_24245 | MxiN                                             |
| CDS | 73709 | 74230 | - | C1192_24250 | protein mxiK                                     |
| CDS | 74235 | 74951 | - | C1192_24255 | EscJ/YscJ/HrcJ family type III secretion inner   |
| CDS | 74957 | 75250 | - | C1192_24260 | protein mxiI                                     |
| CDS | 75264 | 75515 | - | C1192_24265 | EscF/YscF/HrpA family type III secretion system  |
| CDS | 75526 | 76638 | - | C1192_24270 | protein mxiG                                     |
| CDS | 76655 | 77104 | - | C1192_24275 | invasion protein IagB                            |
| CDS | 77101 | 77466 | - | C1192_24280 | molecular chaperone                              |
| CDS | 77476 | 79089 | - | C1192_24285 | type III secretion system effector inositol      |
| CDS | 79399 | 80877 | + | C1192_24290 | virulence factor                                 |

**Table S1 The gene lists of plasmid pEM148 in *E. marmotae* HT073016**

|      |        |        |   |             |                                                  |
|------|--------|--------|---|-------------|--------------------------------------------------|
| CDS  | 80897  | 81286  | + | C1192_24295 | molecular chaperone                              |
| CDS  | 81303  | 81929  | + | C1192_24300 | protein ipgB                                     |
| CDS  | 82000  | 82467  | + | C1192_24305 | type III secretion system translocator chaperone |
| CDS  | 82473  | 84209  | + | C1192_24310 | invasin                                          |
| CDS  | 84224  | 85312  | + | C1192_24315 | IpaC/SipC family type III secretion system       |
| CDS  | 85362  | 86357  | + | C1192_24320 | IpaD/SipD/SspD family type III secretion system  |
| CDS  | 86366  | 90691  | + | C1192_24325 | hypothetical protein                             |
| CDS  | 90694  | 90918  | + | C1192_24330 | acyl carrier protein                             |
| CDS  | 91123  | 92049  | + | C1192_24335 | chromosome partitioning protein ParB             |
| CDS  | 92225  | 92454  | - | C1192_24340 | hypothetical protein                             |
| CDS  | 92756  | 94327  | - | C1192_24345 | IS66 family transposase                          |
| CDS  | 94347  | 94694  | - | C1192_24350 | IS66 family insertion sequence hypothetical      |
| CDS  | 94694  | 95349  | - | C1192_24355 | IS66 family insertion sequence hypothetical      |
| CDS  | 95311  | 95421  | + | C1192_24360 | copper resistance protein                        |
| CDS  | 95640  | 96460  | + | C1192_24365 | IS3 family transposase                           |
| CDS  | 96582  | 97448  | - | C1192_24370 | invasion protein                                 |
| CDS  | 97460  | 98200  | - | C1192_24375 | hypothetical protein                             |
| CDS  | 99150  | 99332  | + | C1192_24380 | AraC family transcriptional regulator            |
| CDS  | 99446  | 99805  | + | C1192_24385 | hypothetical protein                             |
| tRNA | 100074 | 100149 | + | C1192_24390 | tRNA-Met                                         |
| tRNA | 100191 | 100264 | + | C1192_24395 | tRNA-Arg                                         |
| CDS  | 100541 | 104637 | - | C1192_24400 | autotransporter outer membrane beta-barrel       |
| CDS  | 105080 | 105943 | - | C1192_24405 | Effector protein YopJ                            |
| CDS  | 106163 | 106282 | - | C1192_24410 | hypothetical protein                             |
| CDS  | 106497 | 107191 | - | C1192_24415 | IS1 family transposase                           |
| CDS  | 108221 | 117880 | + | C1192_24420 | DUF3491 domain-containing protein                |
| CDS  | 118214 | 118318 | - | C1192_24425 | copper resistance protein                        |
| CDS  | 118280 | 118957 | + | C1192_24430 | IS66 family insertion sequence hypothetical      |
| CDS  | 118957 | 119304 | + | C1192_24435 | IS66 family insertion sequence hypothetical      |
| CDS  | 119324 | 120895 | + | C1192_24440 | IS66 family transposase                          |
| CDS  | 121533 | 121634 | + | C1192_24445 | pcaR domain protein                              |
| CDS  | 121666 | 122290 | - | C1192_24450 | AAA family ATPase                                |
| CDS  | 122312 | 123637 | - | C1192_24455 | IS21 family transposase                          |
| CDS  | 123757 | 124224 | - | C1192_24460 | hypothetical protein                             |
| CDS  | 124231 | 125172 | - | C1192_24465 | shiE                                             |
| CDS  | 125277 | 126427 | + | C1192_24470 | IS3 family transposase                           |
| CDS  | 126529 | 127230 | + | C1192_24475 | cell division protein                            |
| CDS  | 127884 | 128720 | - | C1192_24480 | IS3 family transposase                           |
| CDS  | 128794 | 130002 | + | C1192_24485 | IS256 family transposase                         |
| CDS  | 130041 | 130357 | - | C1192_24490 | IS3 family transposase                           |
| CDS  | 130412 | 130519 | + | C1192_24495 | IS66 family insertion sequence hypothetical      |
| CDS  | 130601 | 131929 | + | C1192_24500 | IS4 family transposase                           |
| CDS  | 131943 | 132320 | + | C1192_24505 | IS66 family insertion sequence hypothetical      |
| CDS  | 132320 | 132667 | + | C1192_24510 | IS66 family insertion sequence hypothetical      |



**Table S1 The gene lists of plasmid pEM148 in *E. marmotae* HT073016**

|     |        |        |   |             |                                                 |
|-----|--------|--------|---|-------------|-------------------------------------------------|
| CDS | 132687 | 134258 | + | C1192_24515 | IS66 family transposase                         |
| CDS | 134284 | 134672 | - | C1192_24520 | IS1 family transposase                          |
| CDS | 134929 | 135921 | - | C1192_24525 | nuclease PIN                                    |
| CDS | 135943 | 136458 | - | C1192_24530 | fimbrial protein                                |
| CDS | 136533 | 137090 | - | C1192_24535 | nuclease PIN                                    |
| CDS | 137126 | 137857 | - | C1192_24540 | molecular chaperone                             |
| CDS | 137926 | 140457 | - | C1192_24545 | PapC/FimD family outer membrane usher protein   |
| CDS | 140621 | 141208 | - | C1192_24550 | type 1 fimbrial protein                         |
| CDS | 141288 | 141821 | - | C1192_24555 | type 1 fimbrial protein                         |
| CDS | 142268 | 142573 | - | C1192_24560 | IS630 family transposase                        |
| CDS | 142729 | 142950 | - | C1192_24565 | hypothetical protein                            |
| CDS | 142980 | 144076 | - | C1192_24570 | conjugative transfer relaxase/helicase TraI     |
| CDS | 144227 | 144557 | - | C1192_24575 | conjugal transfer protein TraN                  |
| CDS | 144636 | 144887 | + | C1192_24580 | type II toxin-antitoxin system Phd/YefM family  |
| CDS | 144884 | 145174 | + | C1192_24585 | type II toxin-antitoxin system RelE/ParE family |
| CDS | 145246 | 145922 | + | C1192_24590 | IS1 family transposase                          |
| CDS | 145971 | 146948 | - | C1192_24595 | chromosome partitioning protein ParB            |
| CDS | 146945 | 148150 | - | C1192_24600 | ParA family protein                             |

**Table S2 The gene lists of plasmid pEM76 in *E. marmotae* HT073016**

|     | <b>start</b> | <b>stop</b> | <b>strand</b> | <b>locus-tag</b> | <b>product</b>                                 |
|-----|--------------|-------------|---------------|------------------|------------------------------------------------|
| CDS | 1            | 978         | +             | C1192_24605      | repFIB replication protein A                   |
| CDS | 1251         | 1991        | -             | C1192_24610      | recombinase                                    |
| CDS | 2112         | 2240        | -             | C1192_24615      | transcriptional regulator                      |
| CDS | 2867         | 3667        | +             | C1192_24620      | hypothetical protein                           |
| CDS | 4220         | 4444        | +             | C1192_24625      | type II toxin-antitoxin system Phd/YefM family |
| CDS | 4441         | 4830        | +             | C1192_24630      | type II toxin-antitoxin system death-on-curing |
| CDS | 4922         | 5029        | +             | C1192_24635      | integrase                                      |
| CDS | 4998         | 6170        | +             | C1192_24640      | IS3 family transposase                         |
| CDS | 6348         | 8645        | +             | C1192_24645      | autotransporter outer membrane beta-barrel     |
| CDS | 8711         | 9919        | -             | C1192_24650      | IS256 family transposase                       |
| CDS | 10197        | 11984       | -             | C1192_24655      | hypothetical protein                           |
| CDS | 12598        | 12690       | +             | C1192_24660      | LuxR family transcriptional regulator          |
| CDS | 12967        | 14655       | -             | C1192_24665      | hypothetical protein                           |
| CDS | 14933        | 15106       | -             | C1192_24670      | IS630 family transposase                       |
| CDS | 15441        | 16295       | +             | C1192_24675      | hypothetical protein                           |
| CDS | 16327        | 17741       | -             | C1192_24680      | IS21 family transposase                        |
| CDS | 17948        | 18199       | -             | C1192_24685      | plasmid stabilization protein                  |
| CDS | 18196        | 18395       | -             | C1192_24690      | hypothetical protein                           |
| CDS | 18553        | 18890       | -             | C1192_24695      | hypothetical protein                           |
| CDS | 18890        | 19081       | +             | C1192_24700      | hypothetical protein                           |
| CDS | 19053        | 19665       | -             | C1192_24705      | type III secretion system protein              |
| CDS | 19874        | 20878       | -             | C1192_24710      | integrase                                      |
| CDS | 20958        | 21347       | -             | C1192_24715      | hypothetical protein                           |
| CDS | 21324        | 22001       | +             | C1192_24720      | IS66 family insertion sequence hypothetical    |
| CDS | 22001        | 22348       | +             | C1192_24725      | IS66 family insertion sequence hypothetical    |
| CDS | 22368        | 23939       | +             | C1192_24730      | IS66 family transposase                        |
| CDS | 24797        | 25081       | +             | C1192_24735      | hypothetical protein                           |
| CDS | 25069        | 25554       | +             | C1192_24740      | N-acetyltransferase                            |
| CDS | 25682        | 26974       | -             | C1192_24745      | IS4 family transposase                         |
| CDS | 27059        | 27187       | +             | C1192_24750      | IS66 family insertion sequence hypothetical    |
| CDS | 27213        | 28784       | -             | C1192_24755      | IS66 family transposase                        |
| CDS | 28804        | 29151       | -             | C1192_24760      | IS66 family insertion sequence hypothetical    |
| CDS | 29151        | 29828       | -             | C1192_24765      | IS66 family insertion sequence hypothetical    |
| CDS | 29949        | 30632       | +             | C1192_24770      | IS66 family transposase                        |
| CDS | 30636        | 30926       | -             | C1192_24775      | type III effector                              |
| CDS | 31197        | 31574       | +             | C1192_24780      | hypothetical protein                           |
| CDS | 32034        | 32675       | +             | C1192_24785      | thiol:disulfide interchange protein            |
| CDS | 32689        | 33240       | +             | C1192_24790      | hypothetical protein                           |
| CDS | 33273        | 33539       | -             | C1192_24795      | hypothetical protein                           |
| CDS | 33719        | 33996       | +             | C1192_24800      | IS3 family transposase                         |
| CDS | 34835        | 39772       | +             | C1192_24805      | inverse autotransporter beta-barrel            |
| CDS | 39890        | 40056       | -             | C1192_24810      | IS256 family transposase                       |
| CDS | 40215        | 40355       | +             | C1192_24815      | IS630 family transposase                       |

**Table S2 The gene lists of plasmid pEM76 in *E. marmotae* HT073016**

|     |       |       |   |             |                                             |
|-----|-------|-------|---|-------------|---------------------------------------------|
| CDS | 40547 | 41503 | + | C1192_24820 | IS481 family transposase                    |
| CDS | 41645 | 42853 | - | C1192_24825 | IS256 family transposase                    |
| CDS | 43166 | 44494 | - | C1192_24830 | IS4 family transposase                      |
| CDS | 44551 | 46209 | - | C1192_24835 | E3 ubiquitin--protein ligase                |
| CDS | 46619 | 46699 | - | C1192_24840 | ferredoxin                                  |
| CDS | 46925 | 47017 | - | C1192_24845 | copper resistance protein                   |
| CDS | 46994 | 47671 | + | C1192_24850 | IS66 family insertion sequence hypothetical |
| CDS | 47671 | 48018 | + | C1192_24855 | IS66 family insertion sequence hypothetical |
| CDS | 48038 | 49609 | + | C1192_24860 | IS66 family transposase                     |
| CDS | 49641 | 50144 | + | C1192_24865 | IS3-like element ISEc16 family transposase  |
| CDS | 50827 | 50934 | + | C1192_24870 | hypothetical protein                        |
| CDS | 51120 | 52924 | - | C1192_24875 | hypothetical protein                        |
| CDS | 53344 | 54494 | - | C1192_24880 | IS3 family transposase                      |
| CDS | 54566 | 54793 | + | C1192_24885 | IS630 family transposase                    |
| CDS | 55064 | 55894 | + | C1192_24890 | AraC family transcriptional regulator       |
| CDS | 56157 | 56421 | + | C1192_24895 | IS630 family transposase                    |
| CDS | 56533 | 56730 | + | C1192_24900 | IS256 family transposase                    |
| CDS | 56889 | 57668 | - | C1192_24905 | AraC family transcriptional regulator       |
| CDS | 58478 | 59922 | - | C1192_24910 | hypothetical protein                        |
| CDS | 60145 | 60924 | - | C1192_24915 | hypothetical protein                        |
| CDS | 61526 | 62212 | + | C1192_24920 | virulence protein SpvD                      |
| CDS | 62646 | 63365 | + | C1192_24925 | type III effector phosphothreonine lyase    |
| CDS | 64017 | 65167 | + | C1192_24930 | IS3 family transposase                      |
| CDS | 65253 | 65852 | - | C1192_24935 | hypothetical protein                        |
| CDS | 65898 | 66332 | - | C1192_24940 | DUF1380 domain-containing protein           |
| CDS | 66345 | 66566 | - | C1192_24945 | hypothetical protein                        |
| CDS | 66567 | 67249 | - | C1192_24950 | DNA methylase                               |
| CDS | 67575 | 68086 | - | C1192_24955 | hypothetical protein                        |
| CDS | 68123 | 68391 | - | C1192_24960 | hypothetical protein                        |
| CDS | 68776 | 69747 | - | C1192_24965 | plasmid-partitioning protein                |
| CDS | 69747 | 70913 | - | C1192_24970 | protein SopA                                |
| CDS | 71501 | 72256 | - | C1192_24975 | replication initiation protein              |
| CDS | 73043 | 73831 | - | C1192_24980 | phage integrase family protein              |
| CDS | 73832 | 74137 | - | C1192_24985 | plasmid maintenance protein CcdB            |
| CDS | 74139 | 74357 | - | C1192_24990 | antitoxin CcdA                              |
| CDS | 74359 | 74594 | + | C1192_24995 | hypothetical protein                        |
| CDS | 74753 | 75338 | + | C1192_25000 | ISL3 family transposase                     |
| CDS | 75621 | 75848 | - | C1192_25005 | hypothetical protein                        |

Table S3 gene list of T3SS compared between *E.marmotae* and *Shigella*

| Genes                   | Location | Query (locus) | Size(bp) | Pathogen hit             | Location                     | Sbjct (locus) | Nucleotide identity(%) | Query cover(%) | Annotation (mechanism)                        |
|-------------------------|----------|---------------|----------|--------------------------|------------------------------|---------------|------------------------|----------------|-----------------------------------------------|
| <i>virB</i>             | pEM148   | C1192_24335   | 927      | <i>Shigella flexneri</i> | Plasmid pCP301 (NC_004851.1) | CP0123        | 80.13                  | 99             | transcriptional activator VirB                |
| <i>Acp</i>              | pEM148   | C1192_24330   | 225      | <i>Shigella flexneri</i> | Plasmid pCP301 (NC_004851.2) | CP0124        | 73.97                  | 98             | Acp, putative acyl carrier protein            |
| <i>ipaA</i> (truncated) | pEM148   | C1192_24325   | 4326     | <i>Shigella flexneri</i> | Plasmid pCP301 (NC_004851.1) | CP0125        | 57.92                  | 81             | <i>ipaA</i> hypothetical protein              |
| <i>ipaD</i>             | pEM148   | C1192_24320   | 996      | <i>Shigella flexneri</i> | Plasmid pCP301 (NC_004851.1) | CP0126        | 77.13                  | 98             | <i>ipaD</i> hypothetical protein              |
| <i>ipaC</i>             | pEM148   | C1192_24315   | 1089     | <i>Shigella flexneri</i> | Plasmid pCP301 (NC_004851.1) | CP0127        | 70                     | 82             | IpaC, secreted by the Mxi-Spa secretion       |
| <i>ipaB</i>             | pEM148   | C1192_24310   | 1737     | <i>Shigella flexneri</i> | Plasmid pCP301 (NC_004851.1) | CP0128        | 70                     | 93             | IpaB, secreted by the Mxi-Spa secretion       |
| <i>ipgC</i>             | pEM148   | C1192_24305   | 468      | <i>Shigella flexneri</i> | Plasmid pCP301 (NC_004851.1) | CP0129        | 71                     | 95             | IpgC, cytoplasmic chaperone for IpaB and IpaC |
| <i>ipgB1</i>            | pEM148   | C1192_24300   | 627      | <i>Shigella flexneri</i> | Plasmid pCP301 (NC_004851.1) | CP0130        | 79                     | 100            | protein IpgB1                                 |
| <i>ipgA</i>             | pEM148   | C1192_24295   | 390      | <i>Shigella flexneri</i> | Plasmid pCP301 (NC_004851.1) | CP0131        | 63.27                  | 100            | chaperone IpgA                                |
| <i>icsB</i>             | pEM148   | C1192_24290   | 1479     | <i>Shigella flexneri</i> | Plasmid pCP301 (NC_004851.1) | CP0132        | 65                     | 77             | IcsB, invasion protein                        |
| <i>ipgD</i>             | pEM148   | C1192_24285   | 1614     | <i>Shigella flexneri</i> | Plasmid pCP301 (NC_004851.1) | CP0133        | 68                     | 64             | hypothetical protein                          |
| <i>ipgE</i>             | pEM148   | C1192_24280   | 366      | <i>Shigella flexneri</i> | Plasmid pCP301 (NC_004851.1) | CP0134        | 69                     | 77             | IpgE, cytoplasmic chaperone for IpgD          |
| <i>ipgF</i>             | pEM148   | C1192_24275   | 450      | <i>Shigella flexneri</i> | Plasmid pCP301 (NC_004851.1) | CP0135        | 72                     | 95             | periplasmic protein IpgF                      |
| <i>mxiG</i>             | pEM148   | C1192_24270   | 1113     | <i>Shigella flexneri</i> | Plasmid pCP301 (NC_004851.1) | CP0136        | 78                     | 85             | MxiG protein                                  |
| <i>mxiH</i>             | pEM148   | C1192_24265   | 252      | <i>Shigella flexneri</i> | Plasmid pCP301 (NC_004851.1) | CP0137        | 71                     | 74             | Mxi-Spa secretion machinery protein MxiH      |
| <i>mxiI</i>             | pEM148   | C1192_24260   | 294      | <i>Shigella flexneri</i> | Plasmid pCP301 (NC_004851.1) | CP0138        | 76                     | 100            | Mxi-Spa secretion machinery protein MxiI      |
| <i>mxiJ</i>             | pEM148   | C1192_24255   | 717      | <i>Shigella flexneri</i> | Plasmid pCP301 (NC_004851.1) | CP0139        | 67                     | 97             | Mxi-Spa secretion machinery protein MxiJ      |
| <i>mxiK</i>             | pEM148   | C1192_24250   | 522      | <i>Shigella flexneri</i> | Plasmid pCP301 (NC_004851.1) | CP0140        | 78                     | 89             | Mxi-Spa secretion machinery protein MxiK      |
| <i>mxiN</i>             | pEM148   | C1192_24245   | 699      | <i>Shigella flexneri</i> | Plasmid pCP301 (NC_004851.1) | CP0141        | 71                     | 78             | Mxi-Spa secretion machinery protein MxiN      |
| <i>mxiL</i>             | pEM148   | C1192_24240   | 408      | <i>Shigella flexneri</i> | Plasmid pCP301 (NC_004851.1) | CP0142        | 74                     | 71             | Mxi-Spa secretion machinery protein MxiL      |
| <i>mxiM</i>             | pEM148   | C1192_24235   | 423      | <i>Shigella flexneri</i> | Plasmid pCP301 (NC_004851.1) | CP0143        | 69                     | 49             | Mxi-Spa secretion machinery protein MxiM      |
| <i>mxiE</i>             | pEM148   | C1192_24230   | 633      | <i>Shigella flexneri</i> | Plasmid pCP301 (NC_004851.1) | CP0144        | 70                     | 98             | AraC-like family protein MxiE                 |
| <i>mxiD</i>             | pEM148   | C1192_24225   | 1698     | <i>Shigella flexneri</i> | Plasmid pCP301 (NC_004851.1) | CP0145        | 75                     | 90             | outermembrane protein MxiD                    |
| <i>mxiC</i>             | pEM148   | C1192_24220   | 1074     | <i>Shigella flexneri</i> | Plasmid pCP301 (NC_004851.1) | CP0146        | 72.38                  | 99             | Mxi-Spa secretion machinery protein           |
| <i>mxiA</i>             | pEM148   | C1192_24215   | 2061     | <i>Shigella flexneri</i> | Plasmid pCP301 (NC_004851.1) | CP0147        | 76.52                  | 99             | Mxi-Spa secretion machinery protein MxiA      |
| <i>spa15</i>            | pEM148   | C1192_24210   | 402      | <i>Shigella flexneri</i> | Plasmid pCP301 (NC_004851.1) | CP0148        | 75.87                  | 97             | Mxi-Spa secretion machinery protein Spa15     |
| <i>spa47</i>            | pEM148   | C1192_24205   | 1293     | <i>Shigella flexneri</i> | Plasmid pCP301 (NC_004851.1) | CP0149        | 75                     | 97             | ATP synthase SpaL                             |
| <i>spa13</i>            | pEM149   | C1192_24200   | 396      | <i>Shigella flexneri</i> | Plasmid pCP301 (NC_004851.1) | CP0150        | 44.64                  | 85             | Mxi-Spa secretion machinery protein Spa13     |
| <i>spa32</i>            | pEM148   | C1192_24195   | 909      | <i>Shigella flexneri</i> | Plasmid pCP301 (NC_004851.1) | CP0151        | 71                     | 69             | Mxi-Spa secretion machinery protein Spa32     |
| <i>spa33</i>            | pEM148   | C1192_24190   | 333      | <i>Shigella flexneri</i> | Plasmid pCP301 (NC_004851.1) | CP0152        | 67                     | 49             | Mxi-Spa secretion machinery protein Spa33     |
| <i>spa24</i>            | pEM148   | C1192_24185   | 651      | <i>Shigella flexneri</i> | Plasmid pCP301 (NC_004851.1) | CP0153        | 78                     | 97             | surface presentation of antigens protein SpaP |
| <i>spa9</i>             | pEM148   | C1192_24180   | 261      | <i>Shigella flexneri</i> | Plasmid pCP301 (NC_004851.2) | CP0154        | 94.12                  | 98             | Mxi-Spa secretion machinery protein Spa9      |
| <i>spa29</i>            | pEM148   | C1192_24175   | 768      | <i>Shigella flexneri</i> | Plasmid pCP301 (NC_004851.1) | CP0155        | 72                     | 98             | Mxi-Spa secretion machinery protein Spa29     |
| <i>spa40</i>            | pEM148   | C1192_24170   | 1029     | <i>Shigella flexneri</i> | Plasmid pCP301 (NC_004851.1) | CP0156        | 74.15                  | 100            | surface presentation of antigens protein SpaS |
| <i>OspD2</i>            | pEM148   | missing       | \        | <i>Shigella flexneri</i> | Plasmid pCP301 (NC_004851.1) | CP0009        | \                      | \              | <i>OspD2</i> hypothetical protein             |
| <i>OspF</i>             | pEM148   | missing       | \        | <i>Shigella flexneri</i> | Plasmid pCP301 (NC_004851.1) | CP0010        | \                      | \              | <i>OspF</i>                                   |
| <i>OspD1</i>            | pEM148   | missing       | \        | <i>Shigella flexneri</i> | Plasmid pCP301 (NC_004851.1) | CP0022        | \                      | \              | protein <i>OspD1</i>                          |
| <i>ipgB2</i>            | pEM148   | missing       | \        | <i>Shigella flexneri</i> | Plasmid pCP301 (NC_004851.1) | CP0024        | \                      | \              | <i>ipgB2</i> hypothetical protein             |
| <i>VirF</i>             | pEM148   | missing       | \        | <i>Shigella flexneri</i> | Plasmid pCP301 (NC_004851.1) | CP0046        | \                      | \              | transcriptional activator <i>VirF</i>         |
| <i>OspE2</i>            | pEM148   | missing       | \        | <i>Shigella flexneri</i> | Plasmid pCP301 (NC_004851.1) | CP0048        | \                      | \              | <i>OspE2</i>                                  |
| <i>OspD3</i>            | pEM148   | missing       | \        | <i>Shigella flexneri</i> | Plasmid pCP301 (NC_004851.1) | CP0093        | \                      | \              | <i>OspD3</i> hypothetical protein             |
| <i>OspC1</i>            | pEM148   | missing       | \        | <i>Shigella flexneri</i> | Plasmid pCP301 (NC_004851.1) | CP0094        | \                      | \              | protein <i>OspC1</i>                          |
| <i>OspC3</i>            | pEM148   | missing       | \        | <i>Shigella flexneri</i> | Plasmid pCP301 (NC_004851.1) | CP0115        | \                      | \              | <i>OspC3</i>                                  |

**Table S3 gene list of T3SS compared between *E.marmotae* and *Shigella***

|                  |        |         |   |                          |                              |         |   |   |                                       |
|------------------|--------|---------|---|--------------------------|------------------------------|---------|---|---|---------------------------------------|
| <i>icsA/virG</i> | pEM148 | missing | \ | <i>Shigella flexneri</i> | Plasmid pCP301 (NC_004851.1) | CP0182  | \ | \ | <i>icsA/virG</i> hypothetical protein |
| <i>OspG</i>      | pEM148 | missing | \ | <i>Shigella flexneri</i> | Plasmid pCP301 (NC_004851.1) | CP0227  | \ | \ | protein <i>OspG</i>                   |
| <i>OspE1</i>     | pEM148 | missing | \ | <i>Shigella flexneri</i> | Plasmid pCP301 (NC_004851.1) | CP0265a | \ | \ | <i>OspE1</i>                          |

Table S4 The virulent genes of *E. marmotae* HT073016

|                          | Genes       | Location   | Size(bp) | Pathogen hit            | Location                             | Nucleotide identity(%) | Query cover(%) | Annotation (mechanism)                                                    | Reference |
|--------------------------|-------------|------------|----------|-------------------------|--------------------------------------|------------------------|----------------|---------------------------------------------------------------------------|-----------|
| O antigen gene cluster   | <i>galF</i> | chromosome | 894      | <i>Escherichia coli</i> | Chromosome (AB811615.1)              | 99                     | 100            | UTP-glucose-1-phosphate uridylyltransferase                               | 1         |
|                          | <i>wffK</i> | chromosome | 816      | <i>Escherichia coli</i> | Chromosome (AB811615.1)              | 100                    | 100            | Glycosyl transferase                                                      | 1         |
|                          | <i>wzy</i>  | chromosome | 1227     | <i>Escherichia coli</i> | Chromosome (AB811615.1)              | 99                     | 100            | O-antigen polymerase                                                      | 1         |
|                          | <i>wzx</i>  | chromosome | 1197     | <i>Escherichia coli</i> | Chromosome (AB811615.1)              | 99                     | 100            | O-antigen flippase                                                        | 1         |
|                          | <i>wffL</i> | chromosome | 867      | <i>Escherichia coli</i> | Chromosome (AB811615.1)              | 99                     | 100            | Glycosyl transferase                                                      | 1         |
|                          | <i>wffM</i> | chromosome | 687      | <i>Escherichia coli</i> | Chromosome (AB811615.1)              | 100                    | 100            | Glycosyltransferase sugar-binding region                                  | 1         |
|                          | <i>galE</i> | chromosome | 1032     | <i>Escherichia coli</i> | Chromosome (AB811615.1)              | 99                     | 100            | UDP-glucose 4-epimerase                                                   | 1         |
|                          | <i>wfgD</i> | chromosome | 747      | <i>Escherichia coli</i> | Chromosome (AB811615.1)              | 99                     | 100            | UDP-Glc:alpha-D-GlcNAc-diphosphoundecaprenol beta-1,3-glucosyltransferase | 1         |
| Type II secretion system | <i>gspM</i> | pEM148     | 537      | <i>Escherichia coli</i> | Chromosome (CP018976.1)              | 85                     | 100            | Inner-membrane platform protein                                           | 2         |
|                          | <i>gspL</i> | pEM148     | 1194     | <i>Escherichia coli</i> | Chromosome (CP018976.1)              | 87                     | 98             | Inner-membrane platform protein                                           | 2         |
|                          | <i>gspK</i> | pEM148     | 981      | <i>Escherichia coli</i> | Chromosome (CP018976.1)              | 91                     | 99             | Minor pseudopilin                                                         | 2         |
|                          | <i>gspJ</i> | pEM148     | 567      | <i>Escherichia coli</i> | Chromosome (CP018976.1)              | 89                     | 99             | Minor pseudopilin                                                         | 2         |
|                          | <i>gspI</i> | pEM148     | 372      | <i>Escherichia coli</i> | Chromosome (CP018976.1)              | 89                     | 100            | Minor pseudopilin                                                         | 2         |
|                          | <i>gspH</i> | pEM148     | 564      | <i>Escherichia coli</i> | Chromosome (CP018976.1)              | 94                     | 100            | Minor pseudopilin                                                         | 2         |
|                          | <i>gspG</i> | pEM148     | 456      | <i>Escherichia coli</i> | Chromosome (CP018976.1)              | 91                     | 100            | Minor pseudopilin                                                         | 2         |
|                          | <i>gspF</i> | pEM148     | 1224     | <i>Escherichia coli</i> | Chromosome (CP018976.1)              | 93                     | 100            | Inner-membrane platform protein                                           | 2         |
|                          | <i>gspE</i> | pEM148     | 1494     | <i>Escherichia coli</i> | Chromosome (CP018976.1)              | 95                     | 100            | Secretion ATPase                                                          | 2         |
|                          | <i>gspD</i> | pEM148     | 2061     | <i>Escherichia coli</i> | Chromosome (CP018976.1)              | 94                     | 100            | Outer-membrane secretin                                                   | 2         |
|                          | <i>gspC</i> | pEM148     | 960      | <i>Escherichia coli</i> | Chromosome (CP018976.1)              | 90                     | 100            | Inner-membrane platform protein                                           | 2         |
| sfp cluster              | <i>sfpA</i> | pEM148     | 534      | <i>Escherichia coli</i> | Plasmid pCFSAN004177_01 (CP012496.1) | 85                     | 100            | Fimbrial protein precursor SfpA                                           | 3         |
|                          | <i>sfpH</i> | pEM148     | 588      | <i>Escherichia coli</i> | Plasmid pCFSAN004177_01 (CP012496.1) | 90                     | 100            | Fimbrial protein SfpH                                                     | 3         |
|                          | <i>sfpC</i> | pEM148     | 2532     | <i>Escherichia coli</i> | Plasmid pCFSAN004177_01 (CP012496.1) | 92                     | 100            | Chaperone                                                                 | 3         |
|                          | <i>sfpD</i> | pEM148     | 732      | <i>Escherichia coli</i> | Plasmid pCFSAN004177_01 (CP012496.1) | 93                     | 100            | Fimbrial protein SfpD                                                     | 3         |
|                          | <i>sfpJ</i> | pEM148     | 558      | <i>Escherichia coli</i> | Plasmid pCFSAN004177_01 (CP012496.1) | 82                     | 100            | Fimbrial protein SfpJ                                                     | 3         |
|                          | <i>sfpF</i> | pEM148     | 516      | <i>Escherichia coli</i> | Plasmid pCFSAN004177_01 (CP012496.1) | 86                     | 100            | Fimbrial protein SfpF                                                     | 3         |
|                          | <i>sfpG</i> | pEM148     | 993      | <i>Escherichia coli</i> | Plasmid pCFSAN004177_01 (CP012496.1) | 86                     | 100            | Fimbrial protein SfpG                                                     | 3         |

**Table S4 The virulent genes of *E. marmotae* HT073016**

|      |                 |            |      |                                |                              |     |     |                                       |    |
|------|-----------------|------------|------|--------------------------------|------------------------------|-----|-----|---------------------------------------|----|
| ipaH | <i>ipaH1</i>    | pEM148     | 1683 | <i>Shigella flexneri</i>       | Chromosome (CP004057)        | 74  | 54  |                                       | 4  |
|      | <i>ipaH2</i>    | pEM148     | 2064 | <i>Shigella flexneri</i>       | Chromosome (CP020086)        | 75  | 45  |                                       | 4  |
|      | <i>ipaH3</i>    | pEM148     | 2292 | -                              | -                            | -   | -   |                                       | 4  |
|      | <i>ipaH4</i>    | pEM148     | 1619 | -                              | -                            | -   | -   |                                       | 4  |
|      | <i>ipaH5</i>    | pEM76      | 801  | -                              | -                            | -   | -   |                                       | 4  |
|      | <i>ipaH6</i>    | pEM76      | 2274 | <i>Shigella sonnei</i>         |                              | 84  | 43  |                                       | 4  |
|      | <i>ipaH7</i>    | pEM76      | 1689 | -                              | -                            | -   | -   |                                       | 4  |
|      | <i>ipaH8</i>    | pEM76      | 1659 | <i>Shigella flexneri</i>       | Plasmid pCP301 (NC_004851.1) | 92  | 99  |                                       | 4  |
|      | <i>ipaH9</i>    | pEM76      | 1977 | <i>Shigella dysenteriae</i>    |                              | 74  | 44  |                                       | 4  |
|      | <i>ipaH10</i>   | chromosome | 2304 | <i>Shigella flexneri</i>       |                              | 93  | 40  |                                       | 4  |
|      | <i>ipaH11</i>   | chromosome | 1824 | <i>Shigella flexneri</i>       |                              | 92  | 51  |                                       | 4  |
|      | <i>yopJ</i>     | pEM148     | 864  | <i>Yersinia enterocolitica</i> | Chromosome (NP_395205)       | 82  | 98  | Effector protein yopJ                 | 5  |
|      | <i>lifA/efa</i> | pEM148     | 9660 | <i>Escherichia coli</i>        | Chromosome (CP015241.1)      | 89  | 100 | Adherence protein                     | 6  |
|      | <i>cif</i>      | pEM148     | 702  | <i>Escherichia coli</i>        | Chromosome (CP020107.1)      | 74  | 92  | T3SS effector cycle inhibiting factor | 7  |
|      | <i>epeA</i>     | pEM148     | 3690 | <i>Escherichia coli</i>        | Plasmid Po113 (AY258503.2)   | 74  | 77  | Autotransporter protease              | 8  |
|      |                 |            |      |                                |                              |     |     |                                       |    |
|      | <i>ospC4</i>    | pEM76      | 1262 | <i>Shigella flexneri</i>       | Plasmid pCP301 (NC_004851.1) | 79  | 98  | OspC4                                 | 9  |
|      | <i>astA</i>     | chromosome | 117  | <i>Escherichia coli</i>        | PlasmidAM1 (AF143819)        | 100 | 100 |                                       | 10 |
|      |                 | pEM148     | 117  | <i>Escherichia coli</i>        | PlasmidAM1(AF143819)         | 100 | 100 |                                       | 10 |
|      |                 | Pem76      | 117  | <i>Escherichia coli</i>        | PlasmidAM1(AF143819)         | 100 | 100 |                                       | 10 |

reference

- 1 Iguchi, A., et al., A complete view of the genetic diversity of the *Escherichia coli* O-antigen biosynthesis gene cluster. DNA Res, 2015. 22: p. 101-7.
- 2 Korotkov, K.V., M. Sandkvist, and W.G. Hol, The type II secretion system: biogenesis, molecular architecture and mechanism. Nat Rev Microbiol, 2012. 10: p. 336-51.
- 3 Musken, A., et al., Anaerobic conditions promote expression of Sfp fimbriae and adherence of sorbitol-fermenting enterohemorrhagic *Escherichia coli* O157:NM to human intestinal epithelial cells. Appl Environ Microbiol, 2008. 74: p. 1087-93.
- 4 Li, P., et al., Ubiquitination and degradation of GBPs by a *Shigella* effector to suppress host defence. Nature, 2017. 551: p. 378-383.
- 5 Mukherjee, S., et al., *Yersinia* YopJ acetylates and inhibits kinase activation by blocking phosphorylation. Science, 2006. 312: p. 1211-4.
- 6 Badea, L., et al., Contribution of Efa1/LifA to the adherence of enteropathogenic *Escherichia coli* to epithelial cells. Microb Pathog, 2003. 34: p. 205-15.
- 7 Hsu, Y., et al., Structure of the cyclomodulin Cif from pathogenic *Escherichia coli*. J Mol Biol, 2008. 384: p. 465-77.
- 8 Leyton, D.L., et al., Transfer region of pO113 from enterohemorrhagic *Escherichia coli*: similarity with R64 and identification of a novel plasmid-encoded autotransporter, EpeA. Infect Immun, 2003. 71: p. 6307-19.
- 9 Jin, Q., et al., Genome sequence of *Shigella flexneri* 2a: insights into pathogenicity through comparison with genomes of *Escherichia coli* K12 and O157. Nucleic Acids Research, 2002. 30: p. 4432-4441.
- 10 A, M., et al., IS1414, an *Escherichia coli* insertion sequence with a heat-stable enterotoxin gene embedded in a transposase-like gene. . Infect Immun, 2000 68: p. 5710-5715.

Table S5 BLASTP of *E. marmotae* putative type VI secretion system (T6SS) locus variable regions.

| T6SS1                                                      |                      |                   |                |                                                                         |                      |                  |                                                           |
|------------------------------------------------------------|----------------------|-------------------|----------------|-------------------------------------------------------------------------|----------------------|------------------|-----------------------------------------------------------|
| similarity between <i>E.marmotae</i> and <i>Salmonella</i> |                      |                   |                |                                                                         |                      |                  |                                                           |
| <u>strain</u>                                              | <u>Query (locus)</u> | <u>% identity</u> | <u>E-value</u> | <u>strain</u>                                                           | <u>Sbjct (locus)</u> | <u>Accession</u> | <u>Description</u>                                        |
| <i>E. marmotae</i><br>HT073016                             | C1192_RS11705        | 80.25%            | 0              | <i>Salmonella enterica</i> subsp. enterica serovar Typhimurium str. LT2 | STM0289              | NP_459287.1      | type VI secretion system tip protein VgrG                 |
| <i>E. marmotae</i><br>HT073016                             | C1192_RS11710        | N                 |                | <i>Salmonella enterica</i> subsp. enterica serovar Typhimurium str. LT2 |                      | NP_459286.1      | putative cytoplasmic protein                              |
| <i>E. marmotae</i><br>HT073016                             | C1192_RS11715        | N                 |                | <i>Salmonella enterica</i> subsp. enterica serovar Typhimurium str. LT2 |                      | NP_459285.1      | putative cytoplasmic protein                              |
| <i>E. marmotae</i><br>HT073016                             | C1192_RS11720        | 74.80%            | 7.00E-137      | <i>Salmonella enterica</i> subsp. enterica serovar Typhimurium str. LT2 | STM0286              | NP_459284.1      | hypothetical protein                                      |
| <i>E. marmotae</i><br>HT073016                             | C1192_RS11725        | 86.31%            | 0              | <i>Salmonella enterica</i> subsp. enterica serovar Typhimurium str. LT2 | STM0285              | NP_459283.1      | type VI secretion system membrane subunit TssM            |
| <i>E. marmotae</i><br>HT073016                             | C1192_RS11730        | N                 |                | <i>Salmonella enterica</i> subsp. enterica serovar Typhimurium str. LT2 |                      | NP_459282.1      | hypothetical protein                                      |
| <i>E. marmotae</i><br>HT073016                             | C1192_RS11735        | 50.00%            | 0.058          | <i>Salmonella enterica</i> subsp. enterica serovar Typhimurium str. LT2 | STM0283              | NP_459281.1      | hypothetical protein                                      |
| <i>E. marmotae</i><br>HT073016                             | C1192_RS11740        | 79.00%            | 0              | <i>Salmonella enterica</i> subsp. enterica serovar Typhimurium str. LT2 | STM0282              | NP_459280.1      | type VI secretion system protein TssL                     |
| <i>E. marmotae</i><br>HT073016                             | C1192_RS11745        | 85.23%            | 0              | <i>Salmonella enterica</i> subsp. enterica serovar Typhimurium str. LT2 | STM0281              | NP_459279.1      | type VI secretion system baseplate subunit TssK           |
| <i>E. marmotae</i><br>HT073016                             | C1192_RS11750        | 74.30%            | 1.00E-94       | <i>Salmonella enterica</i> subsp. enterica serovar Typhimurium str. LT2 | STM0280              | NP_459278.1      | type VI secretion system lipoprotein                      |
| <i>E. marmotae</i><br>HT073016                             |                      | N                 |                | <i>Salmonella enterica</i> subsp. enterica serovar Typhimurium str. LT2 | STM0279              | NP_459277.1      | Hcp1 family type VI secretion system effector             |
| <i>E. marmotae</i><br>HT073016                             |                      | N                 |                | <i>Salmonella enterica</i> subsp. enterica serovar Typhimurium str. LT2 | STM0278              | NP_459276.1      | putative periplasmic protein                              |
| <i>E. marmotae</i><br>HT073016                             |                      | N                 |                | <i>Salmonella enterica</i> subsp. enterica serovar Typhimurium str. LT2 | STM0277              | NP_459275.1      | hypothetical protein                                      |
| <i>E. marmotae</i><br>HT073016                             | C1192_RS11755        | 95.03%            | 6.00E-120      | <i>Salmonella enterica</i> subsp. enterica serovar Typhimurium str. LT2 | STM0276              | NP_459274.1      | type VI secretion system tube protein Hcp                 |
| <i>E. marmotae</i><br>HT073016                             | C1192_RS11760        | 50.91%            | 1.00E-43       | <i>Salmonella enterica</i> subsp. enterica serovar Typhimurium str. LT2 | STM0275              | NP_459273.3      | putative cytoplasmic protein                              |
| <i>E. marmotae</i><br>HT073016                             | C1192_RS11765        | 68.75%            | 1.00E-14       | <i>Salmonella enterica</i> subsp. enterica serovar Typhimurium str. LT2 | STM0274a             | NP_459272.1      | invasol SirA                                              |
| <i>E. marmotae</i><br>HT073016                             | C1192_RS11770        | 93.06%            | 0              | <i>Salmonella enterica</i> subsp. enterica serovar Typhimurium str. LT2 | STM0274              | NP_459271.1      | type VI secretion system contractile sheath large subunit |
| <i>E. marmotae</i><br>HT073016                             | C1192_RS11775        | 93.60%            | 6.00E-121      | <i>Salmonella enterica</i> subsp. enterica serovar Typhimurium str. LT2 | STM0273              | NP_459270.1      | type VI secretion system contractile sheath small subunit |
| <i>E. marmotae</i><br>HT073016                             | C1192_RS11780        | 84.28%            | 0              | <i>Salmonella enterica</i> subsp. enterica serovar Typhimurium str. LT2 | STM0272              | NP_459269.1      | type VI secretion system ATPase                           |



| Table S5 BLASTP of <i>E. marmotae</i> putative type VI secretion system (T6SS) locus variable regions. |                      |                   |                |                                                                                |                      |                  |                                                           |
|--------------------------------------------------------------------------------------------------------|----------------------|-------------------|----------------|--------------------------------------------------------------------------------|----------------------|------------------|-----------------------------------------------------------|
| <i>E. marmotae</i><br>HT073016                                                                         | C1192_RS11785        | 57.57%            | 6.00E-124      | <i>Salmonella enterica</i> subsp. <i>enterica</i> serovar Typhimurium str. LT2 | STM0271              | NP_459268.1      | type VI secretion system-associated protein               |
| <i>E. marmotae</i><br>HT073016                                                                         | C1192_RS11790        | 71.01%            | 4.00E-151      | <i>Salmonella enterica</i> subsp. <i>enterica</i> serovar Typhimurium str. LT2 | STM0270              | NP_459267.1      | impE family protein                                       |
| <i>E. marmotae</i><br>HT073016                                                                         | C1192_RS11795        | 76.22%            | 5.00E-95       | <i>Salmonella enterica</i> subsp. <i>enterica</i> serovar Typhimurium str. LT2 | STM0269              | NP_459266.1      | type VI secretion system baseplate subunit TssE           |
| <i>E. marmotae</i><br>HT073016                                                                         | C1192_RS11800        | 89.63%            | 0.00E+00       | <i>Salmonella enterica</i> subsp. <i>enterica</i> serovar Typhimurium str. LT2 | STM0268              | NP_459265.1      | type VI secretion system baseplate subunit TssF           |
| <i>E. marmotae</i><br>HT073016                                                                         | C1192_RS11805        | 83.99%            | 0.00E+00       | <i>Salmonella enterica</i> subsp. <i>enterica</i> serovar Typhimurium str. LT2 | STM0267              | NP_459264.1      | type VI secretion system baseplate subunit TssG           |
| <i>E. marmotae</i><br>HT073016                                                                         | C1192_RS11810        | 72.44%            | 2.00E-173      | <i>Salmonella enterica</i> subsp. <i>enterica</i> serovar Typhimurium str. LT2 | STM0266              | NP_459263.1      | hypothetical protein                                      |
| <b>T6SS2</b>                                                                                           |                      |                   |                |                                                                                |                      |                  |                                                           |
| similarity between <i>E.marmotae</i> and <i>E.coli</i>                                                 |                      |                   |                |                                                                                |                      |                  |                                                           |
| <u>strain</u>                                                                                          | <u>Query (locus)</u> | <u>% identity</u> | <u>E-value</u> | <u>strain</u>                                                                  | <u>Sbjct (locus)</u> | <u>Accession</u> | <u>Description</u>                                        |
| <i>E. marmotae</i><br>HT073016                                                                         | C1192_RS20665        | 73.17%            | 5.00E-87       | <i>Escherichia coli</i> 042                                                    | EC042_RS24170        | WP_000098939.1   | type VI secretion system contractile sheath small subunit |
| <i>E. marmotae</i><br>HT073016                                                                         | C1192_RS20670        | 85.83%            | 0.00E+00       | <i>Escherichia coli</i> 042                                                    | EC042_RS24175        | WP_000930191.1   | type VI secretion system contractile sheath large subunit |
| <i>E. marmotae</i><br>HT073016                                                                         | C1192_RS20675        | 73.65%            | 0.00E+00       | <i>Escherichia coli</i> 042                                                    | EC042_RS24180        | WP_000708638.1   | type VI secretion system baseplate subunit TssK           |
| <i>E. marmotae</i><br>HT073016                                                                         | C1192_RS20680        | 63.21%            | 3.00E-99       | <i>Escherichia coli</i> 042                                                    | EC042_RS24185        | WP_001040045.1   | type VI secretion system protein ImpK                     |
| <i>E. marmotae</i><br>HT073016                                                                         | C1192_RS20685        | 48.18%            | 1.00E-178      | <i>Escherichia coli</i> 042                                                    | EC042_RS24190        | WP_000558483.1   | cell envelope biogenesis protein OmpA                     |
| <i>E. marmotae</i><br>HT073016                                                                         | C1192_RS20690        | 94.48%            | 6.00E-112      | <i>Escherichia coli</i> 042                                                    | EC042_RS24195        | WP_001007313.1   | Hcp family type VI secretion system effector              |
| <i>E. marmotae</i><br>HT073016                                                                         | C1192_RS20695        | 79.55%            | 0.00%          | <i>Escherichia coli</i> 042                                                    | EC042_RS24200        | WP_000431646.1   | type VI secretion system ATPase TssH                      |
| <i>E. marmotae</i><br>HT073016                                                                         | C1192_RS20700        | 29.17%            | 0.21           | <i>Escherichia coli</i> 042                                                    | EC042_RS24205        | WP_000148361.1   | hypothetical protein                                      |
| <i>E. marmotae</i><br>HT073016                                                                         | N                    | N                 |                | <i>Escherichia coli</i> 042                                                    | EC042_RS28850        | WP_001403984.1   | hypothetical protein                                      |
| <i>E. marmotae</i><br>HT073016                                                                         | N                    | N                 |                | <i>Escherichia coli</i> 042                                                    | EC042_RS24215        | WP_001054503.1   | type VI secretion system tip protein VgrG                 |
| <i>E. marmotae</i><br>HT073016                                                                         | N                    | N                 |                | <i>Escherichia coli</i> 042                                                    | EC042_RS24220        | WP_000170556.1   | DUF2235 domain-containing protein                         |
| <i>E. marmotae</i><br>HT073016                                                                         | N                    | N                 |                | <i>Escherichia coli</i> 042                                                    | EC042_RS24225        | WP_000196359.1   | DUF2931 family protein                                    |
| <i>E. marmotae</i><br>HT073016                                                                         | N                    | N                 |                | <i>Escherichia coli</i> 042                                                    | EC042_RS24230        | WP_000196358.1   | DUF2931 family protein                                    |
| <i>E. marmotae</i><br>HT073016                                                                         | N                    | N                 |                | <i>Escherichia coli</i> 042                                                    | EC042_RS24235        | WP_000033410.1   | PAAR domain-containing protein                            |

| Table S5 BLASTP of <i>E. marmotae</i> putative type VI secretion system (T6SS) locus variable regions. |   |   |  |                             |               |                |                                                           |
|--------------------------------------------------------------------------------------------------------|---|---|--|-----------------------------|---------------|----------------|-----------------------------------------------------------|
| <i>E. marmotae</i><br>HT073016                                                                         | N | N |  | <i>Escherichia coli</i> 042 | EC042_RS24240 | WP_001403985.1 | hypothetical protein                                      |
| <i>E. marmotae</i><br>HT073016                                                                         | N | N |  | <i>Escherichia coli</i> 042 | EC042_RS24245 | WP_001037088.1 | type VI secretion protein VasK                            |
| <i>E. marmotae</i><br>HT073016                                                                         | N | N |  | <i>Escherichia coli</i> 042 | EC042_RS24250 | WP_000146515.1 | type VI secretion system baseplate subunit TssA           |
| <i>E. marmotae</i><br>HT073016                                                                         | N | N |  | <i>Escherichia coli</i> 042 | EC042_RS24255 | WP_000115357.1 | hypothetical protein                                      |
| <i>E. marmotae</i><br>HT073016                                                                         | N | N |  | <i>Escherichia coli</i> 042 | EC042_RS24260 | WP_000342463.1 | type VI secretion system baseplate subunit TssF           |
| <i>E. marmotae</i><br>HT073016                                                                         | N | N |  | <i>Escherichia coli</i> 042 | EC042_RS24265 | WP_000553781.1 | type VI secretion system baseplate subunit TssG           |
| <i>E. marmotae</i><br>HT073016                                                                         | N | N |  | <i>Escherichia coli</i> 042 | EC042_RS24270 | WP_000974469.1 | type VI secretion system lipoprotein TssJ                 |
| <i>E. marmotae</i><br>HT073016                                                                         | N | N |  | <i>Escherichia coli</i> 042 | EC042_RS24275 | WP_001137932.1 | type VI secretion system baseplate subunit TssE           |
| <i>E. marmotae</i><br>HT073016                                                                         | N | N |  | <i>Escherichia coli</i> 042 | EC042_RS24360 | WP_000072549.1 | type VI secretion system contractile sheath small subunit |
| <i>E. marmotae</i><br>HT073016                                                                         | N | N |  | <i>Escherichia coli</i> 042 | EC042_RS24365 | WP_000215053.1 | type VI secretion system contractile sheath large subunit |
| <i>E. marmotae</i><br>HT073016                                                                         | N | N |  | <i>Escherichia coli</i> 042 | EC042_RS24370 | WP_000233190.1 | type VI secretion system protein AaiC/Hcp2                |
| <i>E. marmotae</i><br>HT073016                                                                         | N | N |  | <i>Escherichia coli</i> 042 | EC042_RS24375 | WP_000555548.1 | hypothetical protein                                      |
| <i>E. marmotae</i><br>HT073016                                                                         | N | N |  | <i>Escherichia coli</i> 042 | EC042_RS24380 | WP_001390300.1 | type VI secretion system baseplate subunit TssF           |
| <i>E. marmotae</i><br>HT073016                                                                         | N | N |  | <i>Escherichia coli</i> 042 | EC042_RS24385 | WP_001173973.1 | type VI secretion system baseplate subunit TssG           |
| <i>E. marmotae</i><br>HT073016                                                                         | N | N |  | <i>Escherichia coli</i> 042 | EC042_RS24390 | WP_000198270.1 | type VI secretion system tip protein VgrG                 |
| <i>E. marmotae</i><br>HT073016                                                                         | N | N |  | <i>Escherichia coli</i> 042 | EC042_RS24395 | WP_000005080.1 | hypothetical protein                                      |
| <i>E. marmotae</i><br>HT073016                                                                         | N | N |  | <i>Escherichia coli</i> 042 | EC042_RS24400 | WP_001390299.1 | type VI secretion protein                                 |
| <i>E. marmotae</i><br>HT073016                                                                         | N | N |  | <i>Escherichia coli</i> 042 | EC042_RS24405 | WP_001033155.1 | type VI secretion system protein TssA                     |
| <i>E. marmotae</i><br>HT073016                                                                         | N | N |  | <i>Escherichia coli</i> 042 | EC042_RS24410 | WP_000152745.1 | type VI secretion protein                                 |
| <i>E. marmotae</i><br>HT073016                                                                         | N | N |  | <i>Escherichia coli</i> 042 | EC042_RS24415 | WP_001154665.1 | type VI secretion system baseplate subunit TssK           |
| <i>E. marmotae</i><br>HT073016                                                                         | N | N |  | <i>Escherichia coli</i> 042 | EC042_RS24420 | WP_000480661.1 | hypothetical protein                                      |
| <i>E. marmotae</i><br>HT073016                                                                         | N | N |  | <i>Escherichia coli</i> 042 | EC042_RS24425 | WP_001028111.1 | DotU family type IV/VI secretion system protein           |

| Table S5 BLASTP of <i>E. marmotae</i> putative type VI secretion system (T6SS) locus variable regions. |   |   |  |                             |               |                |                                      |
|--------------------------------------------------------------------------------------------------------|---|---|--|-----------------------------|---------------|----------------|--------------------------------------|
| <i>E. marmotae</i><br>HT073016                                                                         | N | N |  | <i>Escherichia coli</i> 042 | EC042_RS24430 | WP_001403210.1 | hypothetical protein                 |
| <i>E. marmotae</i><br>HT073016                                                                         | N | N |  | <i>Escherichia coli</i> 042 | EC042_RS24435 | WP_000029849.1 | type VI secretion system ATPase TssH |

| Table S6 IS location in the genome of <i>E. marmotae</i> HT073016 |         |                          |                          |            |         |         |
|-------------------------------------------------------------------|---------|--------------------------|--------------------------|------------|---------|---------|
|                                                                   | IS_name | IS family                | locus tag                | location   | orf_L   | orf_R   |
| 1                                                                 | IS4     | IS4                      | 0730-16_genome_1-orf83   | chromosome | 73291   | 71963   |
| 2                                                                 |         | IS4                      | 0730-16_genome_1-orf204  | chromosome | 215046  | 213718  |
| 3                                                                 |         | IS4                      | 0730-16_genome_1-orf419  | chromosome | 449338  | 448010  |
| 4                                                                 |         | IS4                      | 0730-16_genome_1-orf566  | chromosome | 569485  | 568157  |
| 5                                                                 |         | IS4                      | 0730-16_genome_1-orf830  | chromosome | 827342  | 826014  |
| 6                                                                 |         | IS4                      | 0730-16_genome_1-orf934  | chromosome | 941429  | 940101  |
| 7                                                                 |         | IS4                      | 0730-16_genome_1-orf939  | chromosome | 944730  | 946058  |
| 8                                                                 |         | IS4                      | 0730-16_genome_1-orf1097 | chromosome | 1108754 | 1108494 |
| 8                                                                 |         | IS4                      | 0730-16_genome_1-orf1098 | chromosome | 1109822 | 1108755 |
| 9                                                                 |         | IS4                      | 0730-16_genome_1-orf1155 | chromosome | 1171219 | 1169891 |
| 10                                                                |         | IS4                      | 0730-16_genome_1-orf1183 | chromosome | 1195542 | 1196870 |
| 11                                                                |         | IS4                      | 0730-16_genome_1-orf1303 | chromosome | 1306329 | 1307261 |
| 11                                                                |         | IS4                      | 0730-16_genome_1-orf1304 | chromosome | 1307298 | 1307657 |
| 12                                                                |         | IS4                      | 0730-16_genome_1-orf1314 | chromosome | 1315544 | 1314216 |
| 13                                                                |         | IS4                      | 0730-16_genome_1-orf1415 | chromosome | 1424977 | 1426305 |
| 14                                                                |         | IS4                      | 0730-16_genome_1-orf1543 | chromosome | 1586790 | 1585462 |
| 15                                                                |         | IS4                      | 0730-16_genome_1-orf1760 | chromosome | 1804918 | 1806246 |
| 16                                                                |         | IS4                      | 0730-16_genome_1-orf1864 | chromosome | 1920034 | 1918706 |
| 17                                                                |         | IS4                      | 0730-16_genome_1-orf2623 | chromosome | 2722004 | 2720676 |
| 18                                                                |         | IS4                      | 0730-16_genome_1-orf2904 | chromosome | 3001929 | 3000601 |
| 19                                                                |         | IS4                      | 0730-16_genome_1-orf2946 | chromosome | 3055682 | 3055422 |
| 19                                                                |         | IS4                      | 0730-16_genome_1-orf2947 | chromosome | 3056751 | 3055675 |
| 20                                                                |         | IS4                      | 0730-16_genome_1-orf3368 | chromosome | 3528172 | 3529500 |
| 21                                                                |         | IS4                      | 0730-16_genome_1-orf3487 | chromosome | 3672103 | 3673431 |
| 22                                                                |         | IS4                      | 0730-16_genome_1-orf3492 | chromosome | 3678166 | 3676838 |
| 23                                                                |         | IS4                      | 0730-16_genome_1-orf3659 | chromosome | 3853281 | 3854609 |
| 24                                                                |         | IS4                      | 0730-16_genome_1-orf3734 | chromosome | 3933172 | 3932636 |
| 24                                                                |         | IS4                      | 0730-16_genome_1-orf3735 | chromosome | 3933963 | 3933148 |
| 25                                                                |         | IS4                      | 0730-16_genome_1-orf3742 | chromosome | 3942614 | 3943942 |
| 26                                                                |         | IS4                      | 0730-16_genome_1-orf3746 | chromosome | 3947597 | 3946269 |
| 27                                                                |         | IS4                      | 0730-16_genome_1-orf3831 | chromosome | 4034839 | 4036167 |
| 28                                                                |         | IS4                      | 0730-16_genome_1-orf3895 | chromosome | 4094944 | 4096272 |
| 29                                                                |         | IS4                      | 0730-16_genome_1-orf4047 | chromosome | 4271974 | 4273302 |
| 30                                                                |         | IS4                      | 0730-16_genome_1-orf4142 | chromosome | 4366888 | 4368216 |
| 31                                                                |         | IS4                      | 0730-16_genome_1-orf4190 | chromosome | 4412667 | 4411339 |
| 32                                                                |         | IS4                      | 0730-16_genome_1-orf4345 | chromosome | 4591695 | 4593023 |
| 33                                                                | IS4     | 0730-16_genome_1-orf4349 | chromosome               | 4596667    | 4595504 |         |
| 34                                                                | IS4     | Contig5-orf9             | pEM148                   | 7698       | 9026    |         |
| 35                                                                | IS4     | Contig6-orf41            | pEM76                    | 37421      | 38749   |         |
| 36                                                                | IS4     | Contig6-orf55            | pEM76                    | 54941      | 56233   |         |
| 1                                                                 | IS1414  | IS256                    | 0730-16_genome_1-orf201  | chromosome | 211298  | 210090  |
| 2                                                                 |         | IS256                    | 0730-16_genome_1-orf294  | chromosome | 323622  | 324830  |
| 3                                                                 |         | IS256                    | 0730-16_genome_1-orf806  | chromosome | 809570  | 810778  |

| Table S6 IS location in the genome of <i>E. marmotae</i> HT073016 |        |       |                          |            |         |         |
|-------------------------------------------------------------------|--------|-------|--------------------------|------------|---------|---------|
| 4                                                                 |        | IS256 | 0730-16_genome_1-orf866  | chromosome | 858892  | 857684  |
| 5                                                                 |        | IS256 | 0730-16_genome_1-orf935  | chromosome | 941547  | 942755  |
| 6                                                                 |        | IS256 | 0730-16_genome_1-orf1064 | chromosome | 1072022 | 1073230 |
| 7                                                                 |        | IS256 | 0730-16_genome_1-orf1096 | chromosome | 1107227 | 1108435 |
| 8                                                                 |        | IS256 | 0730-16_genome_1-orf1312 | chromosome | 1313989 | 1312781 |
| 9                                                                 |        | IS256 | 0730-16_genome_1-orf1596 | chromosome | 1642595 | 1643803 |
| 10                                                                |        | IS256 | 0730-16_genome_1-orf1682 | chromosome | 1714252 | 1715460 |
| 11                                                                |        | IS256 | 0730-16_genome_1-orf1759 | chromosome | 1804801 | 1803593 |
| 12                                                                |        | IS256 | 0730-16_genome_1-orf1863 | chromosome | 1917405 | 1918613 |
| 13                                                                |        | IS256 | 0730-16_genome_1-orf1898 | chromosome | 1952080 | 1953288 |
| 14                                                                |        | IS256 | 0730-16_genome_1-orf1900 | chromosome | 1955621 | 1956829 |
| 15                                                                |        | IS256 | 0730-16_genome_1-orf2011 | chromosome | 2073721 | 2072513 |
| 16                                                                |        | IS256 | 0730-16_genome_1-orf2179 | chromosome | 2242374 | 2241166 |
| 17                                                                |        | IS256 | 0730-16_genome_1-orf2217 | chromosome | 2285689 | 2286897 |
| 18                                                                |        | IS256 | 0730-16_genome_1-orf2514 | chromosome | 2620328 | 2619120 |
| 19                                                                |        | IS256 | 0730-16_genome_1-orf2599 | chromosome | 2704232 | 2705440 |
| 20                                                                |        | IS256 | 0730-16_genome_1-orf3218 | chromosome | 3355946 | 3357154 |
| 21                                                                |        | IS256 | 0730-16_genome_1-orf3486 | chromosome | 3670766 | 3671974 |
| 22                                                                |        | IS256 | 0730-16_genome_1-orf3490 | chromosome | 3675863 | 3674655 |
| 23                                                                |        | IS256 | 0730-16_genome_1-orf3603 | chromosome | 3792649 | 3791441 |
| 24                                                                |        | IS256 | 0730-16_genome_1-orf3630 | chromosome | 3823084 | 3821876 |
| 25                                                                |        | IS256 | 0730-16_genome_1-orf3731 | chromosome | 3930216 | 3929008 |
| 26                                                                |        | IS256 | 0730-16_genome_1-orf3745 | chromosome | 3946172 | 3944964 |
| 27                                                                |        | IS256 | 0730-16_genome_1-orf3894 | chromosome | 4093607 | 4094815 |
| 28                                                                |        | IS256 | 0730-16_genome_1-orf4048 | chromosome | 4274838 | 4273630 |
| 29                                                                |        | IS256 | 0730-16_genome_1-orf4083 | chromosome | 4307967 | 4306759 |
| 30                                                                |        | IS256 | 0730-16_genome_1-orf4143 | chromosome | 4368313 | 4369521 |
| 31                                                                |        | IS256 | 0730-16_genome_1-orf4344 | chromosome | 4590358 | 4591566 |
| 32                                                                |        | IS256 | 0730-16_genome_1-orf4348 | chromosome | 4595455 | 4594247 |
| 33                                                                |        | IS256 | Contig5-orf7             | pEM148     | 5891    | 7099    |
| 34                                                                |        | IS256 | Contig5-orf33            | pEM148     | 29903   | 31111   |
| 35                                                                |        | IS256 | Contig5-orf63            | pEM148     | 55435   | 56643   |
| 36                                                                |        | IS256 | Contig6-orf42            | pEM76      | 39062   | 40270   |
| 37                                                                |        | IS256 | Contig6-orf73            | pEM76      | 71996   | 73204   |
| 1                                                                 | ISCro1 | IS66  | 0730-16_genome_1-orf507  | chromosome | 522497  | 520926  |
| 1                                                                 |        | IS66  | 0730-16_genome_1-orf508  | chromosome | 522864  | 522517  |
| 1                                                                 |        | IS66  | 0730-16_genome_1-orf509  | chromosome | 523511  | 522864  |
| 2                                                                 |        | IS66  | 0730-16_genome_1-orf565  | chromosome | 567862  | 568146  |
| 2                                                                 |        | IS66  | 0730-16_genome_1-orf567  | chromosome | 569642  | 569947  |
| 2                                                                 |        | IS66  | 0730-16_genome_1-orf567  | chromosome | 569947  | 570294  |
| 2                                                                 |        | IS66  | 0730-16_genome_1-orf569  | chromosome | 570314  | 571885  |
| 3                                                                 |        | IS66  | 0730-16_genome_1-orf581  | chromosome | 583087  | 583734  |
| 3                                                                 |        | IS66  | 0730-16_genome_1-orf582  | chromosome | 583734  | 584081  |
| 3                                                                 |        | IS66  | 0730-16_genome_1-orf583  | chromosome | 584101  | 585672  |

| Table S6 IS location in the genome of <i>E. marmotae</i> HT073016 |      |                          |            |         |         |  |
|-------------------------------------------------------------------|------|--------------------------|------------|---------|---------|--|
| 4                                                                 | IS66 | 0730-16_genome_1-orf829  | chromosome | 825719  | 826003  |  |
| 4                                                                 | IS66 | 0730-16_genome_1-orf831  | chromosome | 827499  | 827804  |  |
| 4                                                                 | IS66 | 0730-16_genome_1-orf832  | chromosome | 827804  | 828151  |  |
| 4                                                                 | IS66 | 0730-16_genome_1-orf833  | chromosome | 828171  | 829742  |  |
| 5                                                                 | IS66 | 0730-16_genome_1-orf938  | chromosome | 944364  | 944648  |  |
| 5                                                                 | IS66 | 0730-16_genome_1-orf940  | chromosome | 946144  | 946449  |  |
| 5                                                                 | IS66 | 0730-16_genome_1-orf941  | chromosome | 946449  | 946796  |  |
| 5                                                                 | IS66 | 0730-16_genome_1-orf942  | chromosome | 946816  | 948387  |  |
| 6                                                                 | IS66 | 0730-16_genome_1-orf988  | chromosome | 989027  | 989512  |  |
| 6                                                                 | IS66 | 0730-16_genome_1-orf989  | chromosome | 989512  | 989859  |  |
| 6                                                                 | IS66 | 0730-16_genome_1-orf990  | chromosome | 989879  | 991450  |  |
| 7                                                                 | IS66 | 0730-16_genome_1-orf1152 | chromosome | 1169133 | 1167562 |  |
| 7                                                                 | IS66 | 0730-16_genome_1-orf1153 | chromosome | 1169500 | 1169153 |  |
| 7                                                                 | IS66 | 0730-16_genome_1-orf1154 | chromosome | 1169805 | 1169500 |  |
| 8                                                                 | IS66 | 0730-16_genome_1-orf1211 | chromosome | 1220567 | 1221052 |  |
| 8                                                                 | IS66 | 0730-16_genome_1-orf1212 | chromosome | 1221052 | 1221399 |  |
| 8                                                                 | IS66 | 0730-16_genome_1-orf1213 | chromosome | 1221419 | 1222990 |  |
| 9                                                                 | IS66 | 0730-16_genome_1-orf1717 | chromosome | 1755041 | 1753470 |  |
| 9                                                                 | IS66 | 0730-16_genome_1-orf1718 | chromosome | 1755408 | 1755061 |  |
| 9                                                                 | IS66 | 0730-16_genome_1-orf1719 | chromosome | 1756055 | 1755408 |  |
| 10                                                                | IS66 | 0730-16_genome_1-orf1941 | chromosome | 1999884 | 1998313 |  |
| 10                                                                | IS66 | 0730-16_genome_1-orf1942 | chromosome | 2000251 | 1999904 |  |
| 10                                                                | IS66 | 0730-16_genome_1-orf1943 | chromosome | 2000898 | 2000251 |  |
| 11                                                                | IS66 | 0730-16_genome_1-orf2090 | chromosome | 2164916 | 2163345 |  |
| 11                                                                | IS66 | 0730-16_genome_1-orf2091 | chromosome | 2165283 | 2164936 |  |
| 11                                                                | IS66 | 0730-16_genome_1-orf2092 | chromosome | 2165930 | 2165283 |  |
| 12                                                                | IS66 | 0730-16_genome_1-orf2184 | chromosome | 2248235 | 2246664 |  |
| 12                                                                | IS66 | 0730-16_genome_1-orf2185 | chromosome | 2248602 | 2248255 |  |
| 12                                                                | IS66 | 0730-16_genome_1-orf2186 | chromosome | 2249249 | 2248602 |  |
| 13                                                                | IS66 | 0730-16_genome_1-orf2219 | chromosome | 2287965 | 2288450 |  |
| 13                                                                | IS66 | 0730-16_genome_1-orf2219 | chromosome | 2288450 | 2288797 |  |
| 13                                                                | IS66 | 0730-16_genome_1-orf2220 | chromosome | 2288817 | 2290388 |  |
| 14                                                                | IS66 | 0730-16_genome_1-orf2221 | chromosome | 2613595 | 2614242 |  |
| 14                                                                | IS66 | 0730-16_genome_1-orf2506 | chromosome | 2614242 | 2614589 |  |
| 14                                                                | IS66 | 0730-16_genome_1-orf2507 | chromosome | 2614609 | 2616180 |  |
| 15                                                                | IS66 | 0730-16_genome_1-orf2508 | chromosome | 2894091 | 2894381 |  |
| 15                                                                | IS66 | 0730-16_genome_1-orf2803 | chromosome | 2894411 | 2894716 |  |
| 15                                                                | IS66 | 0730-16_genome_1-orf2804 | chromosome | 2894716 | 2895063 |  |
| 15                                                                | IS66 | 0730-16_genome_1-orf2805 | chromosome | 2895083 | 2896654 |  |
| 16                                                                | IS66 | 0730-16_genome_1-orf2806 | chromosome | 3102068 | 3100497 |  |
| 16                                                                | IS66 | 0730-16_genome_1-orf2988 | chromosome | 3102435 | 3102088 |  |
| 16                                                                | IS66 | 0730-16_genome_1-orf2989 | chromosome | 3103082 | 3102435 |  |
| 17                                                                | IS66 | 0730-16_genome_1-orf3199 | chromosome | 3339044 | 3337473 |  |
| 17                                                                | IS66 | 0730-16_genome_1-orf3200 | chromosome | 3339411 | 3339064 |  |

| Table S6 IS location in the genome of <i>E. marmotae</i> HT073016 |        |                          |                          |            |         |         |
|-------------------------------------------------------------------|--------|--------------------------|--------------------------|------------|---------|---------|
| 17                                                                |        | IS66                     | 0730-16_genome_1-orf3201 | chromosome | 3340058 | 3339411 |
| 18                                                                |        | IS66                     | 0730-16_genome_1-orf3213 | chromosome | 3352617 | 3351046 |
| 18                                                                |        | IS66                     | 0730-16_genome_1-orf3214 | chromosome | 3352984 | 3352637 |
| 18                                                                |        | IS66                     | 0730-16_genome_1-orf3215 | chromosome | 3353631 | 3352984 |
| 19                                                                |        | IS66                     | 0730-16_genome_1-orf3832 | chromosome | 4036253 | 4036558 |
| 19                                                                |        | IS66                     | 0730-16_genome_1-orf3833 | chromosome | 4036558 | 4036905 |
| 19                                                                |        | IS66                     | 0730-16_genome_1-orf3834 | chromosome | 4036925 | 4038496 |
| 20                                                                |        | IS66                     | Contig5-orf10            | pEM148     | 9112    | 9417    |
| 20                                                                |        | IS66                     | Contig5-orf11            | pEM148     | 9417    | 9764    |
| 20                                                                |        | IS66                     | Contig5-orf12            | pEM148     | 9784    | 11355   |
| 21                                                                |        | IS66                     | Contig5-orf141           | pEM148     | 144863  | 145210  |
| 21                                                                |        | IS66                     | Contig5-orf142           | pEM148     | 145230  | 146801  |
| 21                                                                |        | IS66                     | Contig5-orf143           | pEM148     | 147386  | 147847  |
| 22                                                                |        | IS66                     | Contig6-orf36            | pEM76      | 32306   | 33877   |
| 22                                                                |        | IS66                     | Contig6-orf37            | pEM76      | 33897   | 34244   |
| 22                                                                |        | IS66                     | Contig6-orf38            | pEM78      | 34244   | 34891   |
| 23                                                                |        | IS66                     | Contig6-orf52            | pEM76      | 52117   | 52764   |
| 23                                                                |        | IS66                     | Contig6-orf53            | pEM76      | 52764   | 53111   |
| 23                                                                |        | IS66                     | Contig6-orf54            | pEM78      | 53131   | 54702   |
| 24                                                                |        | IS66                     | Contig6-orf58            | pEM76      | 57976   | 59547   |
| 24                                                                |        | IS66                     | Contig6-orf59            | pEM76      | 59567   | 59914   |
| 24                                                                |        | IS66                     | Contig6-orf60            | pEM78      | 59914   | 60561   |
| 1                                                                 | ISEc16 | IS3                      | 0730-16_genome_1-orf30   | chromosome | 30878   | 31732   |
| 1                                                                 |        | IS3                      | 0730-16_genome_1-orf490  | chromosome | 508817  | 509116  |
| 2                                                                 |        | IS3                      | 0730-16_genome_1-orf947  | chromosome | 951199  | 950345  |
| 2                                                                 |        | IS3                      | 0730-16_genome_1-orf948  | chromosome | 951495  | 951256  |
| 3                                                                 |        | IS3                      | 0730-16_genome_1-orf1002 | chromosome | 1008458 | 1007604 |
| 3                                                                 |        | IS3                      | 0730-16_genome_1-orf1003 | chromosome | 1008754 | 1008455 |
| 4                                                                 |        | IS3                      | 0730-16_genome_1-orf1164 | chromosome | 1178073 | 1177219 |
| 4                                                                 |        | IS3                      | 0730-16_genome_1-orf1165 | chromosome | 1178369 | 1178070 |
| 5                                                                 |        | IS3                      | 0730-16_genome_1-orf1214 | chromosome | 1223226 | 1223525 |
| 5                                                                 |        | IS3                      | 0730-16_genome_1-orf1215 | chromosome | 1223522 | 1224139 |
| 6                                                                 |        | IS3                      | 0730-16_genome_1-orf2019 | chromosome | 2081349 | 2080495 |
| 6                                                                 |        | IS3                      | 0730-16_genome_1-orf2020 | chromosome | 2081645 | 2081346 |
| 7                                                                 |        | IS3                      | 0730-16_genome_1-orf2510 | chromosome | 2617142 | 2617435 |
| 7                                                                 |        | IS3                      | 0730-16_genome_1-orf2511 | chromosome | 2617496 | 2617795 |
| 8                                                                 |        | IS3                      | 0730-16_genome_1-orf2512 | chromosome | 2617792 | 2618646 |
| 8                                                                 |        | IS3                      | 0730-16_genome_1-orf2513 | chromosome | 2618685 | 2619110 |
| 9                                                                 |        | IS3                      | 0730-16_genome_1-orf3004 | chromosome | 3117209 | 3117508 |
| 9                                                                 |        | IS3                      | 0730-16_genome_1-orf3005 | chromosome | 3117505 | 3118359 |
| 10                                                                |        | IS3                      | 0730-16_genome_1-orf3848 | chromosome | 4050638 | 4050937 |
| 10                                                                |        | IS3                      | 0730-16_genome_1-orf3849 | chromosome | 4050934 | 4051788 |
| 11                                                                | IS3    | 0730-16_genome_1-orf3962 | chromosome               | 4174129    | 4174428 |         |
| 11                                                                | IS3    | 0730-16_genome_1-orf3963 | chromosome               | 4174425    | 4175279 |         |

| Table S6 IS location in the genome of <i>E. marmotae</i> HT073016 |        |       |                          |            |         |         |
|-------------------------------------------------------------------|--------|-------|--------------------------|------------|---------|---------|
| 12                                                                |        | IS3   | 0730-16_genome_1-orf4006 | chromosome | 4227419 | 4226565 |
| 12                                                                |        | IS3   | 0730-16_genome_1-orf4007 | chromosome | 4227715 | 4227416 |
| 13                                                                |        | IS3   | 0730-16_genome_1-orf4276 | chromosome | 4514006 | 4514305 |
| 13                                                                |        | IS3   | 0730-16_genome_1-orf4277 | chromosome | 4514302 | 4515156 |
| 14                                                                |        | IS3   | 0730-16_genome_1-orf4434 | chromosome | 4668040 | 4667186 |
| 14                                                                |        | IS3   | 0730-16_genome_1-orf4435 | chromosome | 4668336 | 4668037 |
| 15                                                                |        | IS3   | Contig5-orf3             | pEM148     | 2374    | 2673    |
| 15                                                                |        | IS3   | Contig5-orf4             | pEM148     | 2670    | 3524    |
| 16                                                                |        | IS3   | Contig5-orf47            | pEM148     | 43719   | 44573   |
| 16                                                                |        | IS3   | Contig5-orf48            | pEM148     | 44570   | 44869   |
| 17                                                                |        | IS3   | Contig5-orf50            | pEM148     | 46065   | 46364   |
| 17                                                                |        | IS3   | Contig5-orf51            | pEM148     | 46361   | 47215   |
| 18                                                                |        | IS3   | Contig6-orf21            | pEM76      | 16748   | 17602   |
| 18                                                                |        | IS3   | Contig6-orf22            | pEM76      | 17599   | 17898   |
| 19                                                                |        | IS3   | Contig5-orf31            | pEM76      | 27421   | 27720   |
| 19                                                                |        | IS3   | Contig6-orf32            | pEM76      | 27717   | 28571   |
| 1                                                                 | IS1H   | IS1   | 0730-16_genome_1-orf26   | chromosome | 29126   | 29398   |
| 1                                                                 |        | IS1   | 0730-16_genome_1-orf27   | chromosome | 29425   | 29820   |
| 2                                                                 |        | IS1   | Contig5-orf25            | pEM148     | 21981   | 22271   |
| 2                                                                 |        | IS1   | Contig5-orf26            | pEM148     | 22343   | 22615   |
| 3                                                                 |        | IS1   | Contig5-orf13            | pEM148     | 11497   | 11769   |
| 1                                                                 | ISEc1  | ISAs1 | 0730-16_genome_1-orf1720 | chromosome | 1757255 | 1756290 |
| 1                                                                 | ISEc13 | IS4   | 0730-16_genome_1-orf293  | chromosome | 321790  | 323163  |
| 1                                                                 | IS911  | IS3   | Contig6-orf1             | pEM76      | 455     | 757     |



**Table S7 Pseudogenes with known functions identified in the genome of *E. marmotae* HT073016**

| pseudo gene list | genome locus tag        | mutation   | Gene          | Description                                                                        |
|------------------|-------------------------|------------|---------------|------------------------------------------------------------------------------------|
| 1                | 0730-16_genome_1-orf34  | Stop codon | -             | replication protein                                                                |
|                  | 0730-16_genome_1-orf35  | Stop codon | -             | phage replication protein                                                          |
| 2                | 0730-16_genome_1-orf49  | Stop codon | -             | phage integrase family protein                                                     |
|                  | 0730-16_genome_1-orf50  | Stop codon | -             | integrase                                                                          |
| 3                | 0730-16_genome_1-orf131 | Stop codon | <i>yfaD</i>   | hypothetical protein                                                               |
|                  | 0730-16_genome_1-orf132 | Stop codon | <i>yfaD</i>   | hypothetical protein                                                               |
| 4                | 0730-16_genome_1-orf143 | Stop codon | <i>yfaL</i>   | adhesin                                                                            |
|                  | 0730-16_genome_1-orf144 | Stop codon | -             | adhesin                                                                            |
|                  | 0730-16_genome_1-orf145 | Stop codon | <i>yfaL</i>   | outer membrane autotransporter barrel domain-containing protein                    |
| 5                | 0730-16_genome_1-orf207 | Stop codon | <i>setB</i>   | sugar transporter                                                                  |
|                  | 0730-16_genome_1-orf208 | Stop codon | <i>yeiO</i>   | sugar transporter                                                                  |
| 6                | 0730-16_genome_1-orf261 | Stop codon | <i>molR_C</i> | molybdate metabolism regulator MolR                                                |
|                  | 0730-16_genome_1-orf262 | Stop codon | -             | molybdate metabolism regulator MolR                                                |
| 7                | 0730-16_genome_1-orf263 | Stop codon | -             | hypothetical protein                                                               |
|                  | 0730-16_genome_1-orf264 | Stop codon | <i>molR_A</i> | hypothetical protein                                                               |
| 8                | 0730-16_genome_1-orf299 | Stop codon | <i>alkA</i>   | 3-methyl-adenine DNA glycosylase                                                   |
|                  | 0730-16_genome_1-orf300 | Stop codon | <i>alkA</i>   | DNA-3-methyladenine glycosylase 2                                                  |
| 9                | 0730-16_genome_1-orf361 | Stop codon | <i>pduN</i>   | ethanolamine utilization EutN/carboxysome family protein                           |
| 10               | 0730-16_genome_1-orf373 | Stop codon | <i>pduF</i>   | propanediol diffusion facilitator                                                  |
|                  | 0730-16_genome_1-orf374 | Stop codon | <i>pduF</i>   | propanediol diffusion facilitator                                                  |
| 11               | 0730-16_genome_1-orf381 | Stop codon | <i>nac</i>    | LysR family transcriptional regulator                                              |
|                  | 0730-16_genome_1-orf382 | Stop codon | <i>nac</i>    | LysR family transcriptional regulator                                              |
| 12               | 0730-16_genome_1-orf384 | Stop codon | <i>yeeO</i>   | MATE efflux family protein                                                         |
|                  | 0730-16_genome_1-orf385 | Stop codon | <i>yeeO</i>   | MATE efflux family protein                                                         |
| 13               | 0730-16_genome_1-orf468 | Stop codon | <i>flhA</i>   | flagellar biosynthesis protein flhA                                                |
|                  | 0730-16_genome_1-orf469 | Stop codon | <i>flhA</i>   | flagellar biosynthesis protein flhA                                                |
| 14               | 0730-16_genome_1-orf598 | Stop codon | <i>cspC</i>   | Cold shock-like protein cspC                                                       |
| 15               | 0730-16_genome_1-orf626 | Stop codon | <i>yeaL</i>   | membrane protein                                                                   |
|                  | 0730-16_genome_1-orf627 | Stop codon | <i>yeaL</i>   | hypothetical protein                                                               |
| 16               | 0730-16_genome_1-orf744 | Stop codon | -             | inner membrane protein                                                             |
|                  | 0730-16_genome_1-orf745 | Stop codon | <i>ydhK</i>   | inner membrane protein                                                             |
| 17               | 0730-16_genome_1-orf793 | Stop codon | <i>ynfM</i>   | membrane protein                                                                   |
|                  | 0730-16_genome_1-orf794 | Stop codon | <i>ynfM</i>   | membrane protein                                                                   |
| 18               | 0730-16_genome_1-orf802 | Stop codon | <i>ynfE</i>   | oxidoreductase                                                                     |
|                  | 0730-16_genome_1-orf803 | Stop codon | <i>ynfE</i>   | dimethyl sulfoxide reductase subunit A                                             |
| 19               | 0730-16_genome_1-orf815 | Stop codon | -             | dicB family protein                                                                |
|                  | 0730-16_genome_1-orf816 | Stop codon | -             | division inhibition protein DicB                                                   |
| 20               | 0730-16_genome_1-orf878 | Stop codon | <i>fdnG</i>   | formate dehydrogenase, nitrate inducible, alpha subunit, selenocysteine-containing |
| 21               | 0730-16_genome_1-orf895 | Stop codon | -             | zinc protease PqqL                                                                 |
|                  | 0730-16_genome_1-orf896 | Stop codon | -             | zinc protease                                                                      |
| 22               | 0730-16_genome_1-orf902 | Stop codon | -             | intimin-like protein SinH                                                          |
|                  | 0730-16_genome_1-orf903 | Stop codon | <i>eaeH</i>   | adhesin/invasin                                                                    |
| 23               | 0730-16_genome_1-orf943 | Insertion  | -             | H repeat-associated protein yhhI                                                   |

**Table S7 Pseudogenes with known functions identified in the genome of *E. marmotae* HT073016**

|    |                          |            |              |                                                                                                                |
|----|--------------------------|------------|--------------|----------------------------------------------------------------------------------------------------------------|
| 24 | 0730-16_genome_1-orf953  | Stop codon | <i>yncB</i>  | oxidoreductase, Zn-dependent and NAD-binding                                                                   |
|    | 0730-16_genome_1-orf954  | Stop codon | <i>yncB</i>  | oxidoreductase, Zn-dependent and NAD-binding                                                                   |
| 25 | 0730-16_genome_1-orf984  | Stop codon | <i>gapC</i>  | glyceraldehyde-3-phosphate dehydrogenase                                                                       |
|    | 0730-16_genome_1-orf985  | Stop codon | <i>gapC</i>  | glyceraldehyde-3-phosphate dehydrogenase C                                                                     |
| 26 | 0730-16_genome_1-orf1001 | Insertion  | <i>ompN</i>  | outer membrane porin protein C                                                                                 |
|    | 0730-16_genome_1-orf1004 | Insertion  | <i>ompN</i>  | outer membrane porin protein C                                                                                 |
| 27 | 0730-16_genome_1-orf1017 | Stop codon | -            | hypothetical protein                                                                                           |
|    | 0730-16_genome_1-orf1018 | Stop codon | -            | hypothetical protein                                                                                           |
| 28 | 0730-16_genome_1-orf1071 | Stop codon | <i>yciQ</i>  | inner membrane protein                                                                                         |
|    | 0730-16_genome_1-orf1072 | Stop codon | -            | inner membrane protein                                                                                         |
| 29 | 0730-16_genome_1-orf1119 | Stop codon | -            | fused DNA-binding response regulator NarL and sensory histidine kinase NarX in two-component regulatory system |
| 30 | 0730-16_genome_1-orf1207 | Stop codon | <i>ybcM</i>  | bacterial regulatory helix-turn-helix s, AraC family protein                                                   |
| 31 | 0730-16_genome_1-orf1284 | Stop codon | <i>flgE</i>  | flagellar hook protein FlgE                                                                                    |
|    | 0730-16_genome_1-orf1285 | Stop codon | <i>flgE</i>  | flagellar hook protein FlgE                                                                                    |
| 32 | 0730-16_genome_1-orf1289 | Stop codon | <i>flgA</i>  | flagellar basal body P-ring biosynthesis protein FlgA                                                          |
|    | 0730-16_genome_1-orf1290 | Stop codon | <i>flgA</i>  | flagella basal body P-ring formation protein flgA                                                              |
| 33 | 0730-16_genome_1-orf1310 | Stop codon | -            | multidrug transporter                                                                                          |
| 34 | 0730-16_genome_1-orf1313 | Insertion  | <i>yceK</i>  | lipoprotein                                                                                                    |
| 35 | 0730-16_genome_1-orf1332 | Stop codon | <i>phoH</i>  | hypothetical protein                                                                                           |
|    | 0730-16_genome_1-orf1333 | Stop codon | <i>phoH</i>  | protein phoH                                                                                                   |
| 36 | 0730-16_genome_1-orf1586 | Stop codon | -            | aconitate hydratase 1                                                                                          |
|    | 0730-16_genome_1-orf1587 | Stop codon | -            | aconitate hydratase 1, partial                                                                                 |
| 37 | 0730-16_genome_1-orf1623 | Stop codon | -            | glutamate mutase                                                                                               |
|    | 0730-16_genome_1-orf1624 | Stop codon | <i>glmL</i>  | hypothetical protein                                                                                           |
| 38 | 0730-16_genome_1-orf1688 | Stop codon | <i>hutH</i>  | hypothetical protein                                                                                           |
| 39 | 0730-16_genome_1-orf1721 | Stop codon | -            | H repeat-associated protein yhhI                                                                               |
| 40 | 0730-16_genome_1-orf1724 | Stop codon | -            | YD repeat                                                                                                      |
|    | 0730-16_genome_1-orf1725 | Stop codon | -            | YD repeat                                                                                                      |
| 41 | 0730-16_genome_1-orf1756 | Stop codon | <i>gltJ</i>  | glutamate/aspartate transport system permease gltJ                                                             |
| 42 | 0730-16_genome_1-orf1785 | Stop codon | <i>cspE</i>  | cold shock protein CspE                                                                                        |
| 43 | 0730-16_genome_1-orf1811 | Stop codon | <i>entB</i>  | 2,3-dihydroxybenzoate--AMP ligase                                                                              |
| 44 | 0730-16_genome_1-orf1844 | Stop codon | <i>ybcJ</i>  | hypothetical protein                                                                                           |
| 45 | 0730-16_genome_1-orf1855 | Stop codon | <i>fdrA</i>  | membrane protein                                                                                               |
|    | 0730-16_genome_1-orf1856 | Stop codon | <i>fdrA</i>  | protein fdrA                                                                                                   |
| 46 | 0730-16_genome_1-orf1862 | Insertion  | <i>allB</i>  | allantoinase                                                                                                   |
|    | 0730-16_genome_1-orf1865 | Insertion  | <i>allB</i>  | allantoinase                                                                                                   |
| 47 | 0730-16_genome_1-orf1872 | Stop codon | <i>ybbS</i>  | LysR family transcriptional regulator                                                                          |
|    | 0730-16_genome_1-orf1873 | Stop codon | -            | DNA-binding transcriptional activator AllS                                                                     |
| 58 | 0730-16_genome_1-orf1889 | Stop codon | <i>siiDA</i> | hemolysin D                                                                                                    |
|    | 0730-16_genome_1-orf1890 | Stop codon | -            | TolC family type I secretion outer membrane protein                                                            |
| 49 | 0730-16_genome_1-orf1896 | Insertion  | <i>ushA</i>  | protein UshA                                                                                                   |
|    | 0730-16_genome_1-orf1897 | Insertion  | <i>ushA</i>  | protein UshA                                                                                                   |
|    | 0730-16_genome_1-orf1901 | Insertion  | <i>ushA</i>  | bifunctional UDP-sugar hydrolase/5'-nucleotidase periplasmic precursor                                         |
| 50 | 0730-16_genome_1-orf1922 | Stop codon | <i>hha</i>   | modulator of gene expression, with H-NS                                                                        |

**Table S7 Pseudogenes with known functions identified in the genome of *E. marmotae* HT073016**

|    |                          |            |             |                                                                 |
|----|--------------------------|------------|-------------|-----------------------------------------------------------------|
| 51 | 0730-16_genome_1-orf1936 | Stop codon | <i>ybaE</i> | ABC transporter periplasmic-binding protein                     |
|    | 0730-16_genome_1-orf1937 | Stop codon | <i>ybaE</i> | hypothetical protein                                            |
| 52 | 0730-16_genome_1-orf1999 | Stop codon | <i>psiF</i> | hypothetical protein                                            |
| 53 | 0730-16_genome_1-orf2003 | Stop codon | <i>yaiZ</i> | hypothetical protein                                            |
| 54 | 0730-16_genome_1-orf2010 | Insertion  | -           | membrane protein                                                |
|    | 0730-16_genome_1-orf2012 | Insertion  | -           | membrane protein                                                |
| 55 | 0730-16_genome_1-orf2018 | Insertion  | <i>yaiS</i> | hypothetical protein                                            |
|    | 0730-16_genome_1-orf2021 | Insertion  | <i>yaiS</i> | hypothetical protein                                            |
| 56 | 0730-16_genome_1-orf2037 | Stop codon | -           | AraC family transcriptional regulator                           |
|    | 0730-16_genome_1-orf2038 | Stop codon | -           | AraC family transcriptional regulator                           |
| 57 | 0730-16_genome_1-orf2044 | Stop codon | <i>codB</i> | cytosine permease                                               |
|    | 0730-16_genome_1-orf2045 | Stop codon | <i>codB</i> | cytosine permease                                               |
| 58 | 0730-16_genome_1-orf2053 | Stop codon | <i>yahN</i> | membrane protein                                                |
|    | 0730-16_genome_1-orf2054 | Stop codon | -           | membrane protein                                                |
| 59 | 0730-16_genome_1-orf2069 | Stop codon | -           | AidA-I adhesin-like protein                                     |
|    | 0730-16_genome_1-orf2070 | Stop codon | <i>aidA</i> | outer membrane autotransporter barrel domain-containing protein |
| 60 | 0730-16_genome_1-orf2142 | Stop codon | -           | flagellar hook capping protein                                  |
|    | 0730-16_genome_1-orf2143 | Stop codon | -           | flagellar hook capping protein                                  |
| 61 | 0730-16_genome_1-orf2153 | Stop codon | <i>lfiJ</i> | hypothetical protein                                            |
|    | 0730-16_genome_1-orf2154 | Stop codon | <i>lfiJ</i> | flagellar export protein FliJ                                   |
| 62 | 0730-16_genome_1-orf2166 | Stop codon | <i>flhB</i> | flagellar biosynthesis protein FlhB                             |
|    | 0730-16_genome_1-orf2167 | Stop codon | <i>flhB</i> | flagellar biosynthesis protein FlhB                             |
| 63 | 0730-16_genome_1-orf2168 | Stop codon | <i>flhA</i> | flagella biosynthesis protein FlhA                              |
|    | 0730-16_genome_1-orf2169 | Stop codon | <i>fliA</i> | flagellar biosynthesis protein FlhA                             |
|    | 0730-16_genome_1-orf2170 | Stop codon | -           | flagellar biosynthesis protein FlhA                             |
| 64 | 0730-16_genome_1-orf2180 | Stop codon | -           | hypothetical protein                                            |
|    | 0730-16_genome_1-orf2181 | Stop codon | -           | hypothetical protein                                            |
| 65 | 0730-16_genome_1-orf2280 | Stop codon | <i>hrpB</i> | ATP-dependent RNA helicase hrpB                                 |
|    | 0730-16_genome_1-orf2281 | Stop codon | <i>hrpB</i> | ATP-dependent RNA helicase hrpB                                 |
| 66 | 0730-16_genome_1-orf2347 | Stop codon | <i>ftsI</i> | cell division protein FtsI                                      |
|    | 0730-16_genome_1-orf2348 | Stop codon | <i>ftsL</i> | cell division protein FtsI                                      |
| 67 | 0730-16_genome_1-orf2473 | Stop codon | <i>hsdR</i> | type I restriction enzyme EcoKI R protein                       |
|    | 0730-16_genome_1-orf2474 | Stop codon | <i>hsdR</i> | type I restriction enzyme EcoKI R protein                       |
|    | 0730-16_genome_1-orf2475 | Stop codon | <i>hsdR</i> | type I restriction enzyme EcoKI subunit R                       |
| 68 | 0730-16_genome_1-orf2496 | Stop codon | <i>fimH</i> | FimH.FliC fusion protein                                        |
| 69 | 0730-16_genome_1-orf2608 | Stop codon | -           | dicB family protein                                             |
|    | 0730-16_genome_1-orf2609 | Stop codon | -           | division inhibition protein DicB                                |
| 70 | 0730-16_genome_1-orf2682 | Stop codon | <i>rpmJ</i> | Preprotein translocase subunit secY                             |
| 71 | 0730-16_genome_1-orf2701 | Stop codon | <i>rplW</i> | rpL23-SA fusion protein                                         |
| 72 | 0730-16_genome_1-orf2719 | Stop codon | -           | glutathione-regulated potassium-efflux system protein kefB      |
| 73 | 0730-16_genome_1-orf2731 | Stop codon | <i>fic</i>  | cell filamentation protein Fic                                  |
| 74 | 0730-16_genome_1-orf2751 | Stop codon | <i>dam</i>  | Dam methyltransferase with SUUR CDS                             |
| 75 | 0730-16_genome_1-orf2963 | Stop codon | <i>avtA</i> | valine--pyruvate aminotransferase                               |
|    | 0730-16_genome_1-orf2964 | Stop codon | <i>avtA</i> | valine--pyruvate aminotransferase                               |

**Table S7 Pseudogenes with known functions identified in the genome of *E. marmotae* HT073016**

|     |                          |            |             |                                                                           |
|-----|--------------------------|------------|-------------|---------------------------------------------------------------------------|
| 76  | 0730-16_genome_1-orf2981 | Stop codon | <i>fdoG</i> | formate dehydrogenase-O, large subunit homolgoy with fergusonii           |
| 77  | 0730-16_genome_1-orf3060 | Stop codon | <i>rhtC</i> | threonine transporter RhtB                                                |
|     | 0730-16_genome_1-orf3061 | Stop codon | <i>rhtC</i> | threonine efflux protein                                                  |
| 78  | 0730-16_genome_1-orf3100 | Stop codon | <i>trxA</i> | thioredoxin/transketolase fusion protein                                  |
| 79  | 0730-16_genome_1-orf3158 | Stop codon | <i>rpmH</i> | PREDICTED: ribonuclease P protein component-like                          |
| 80  | 0730-16_genome_1-orf3169 | Stop codon | -           | 2-oxo-3-deoxygalactonate 6-phosphate aldolase and galactonate dehydratase |
| 81  | 0730-16_genome_1-orf3174 | Stop codon | <i>ibpA</i> | inclusion body protein A - yellow fluorescent protein fusion              |
| 82  | 0730-16_genome_1-orf3217 | Insertion  | <i>yicI</i> | alpha-xylosidase                                                          |
| 83  | 0730-16_genome_1-orf3323 | Stop codon | -           | transcriptional regulator                                                 |
|     | 0730-16_genome_1-orf3324 | Stop codon | -           | transcriptional regulator                                                 |
| 84  | 0730-16_genome_1-orf3325 | Stop codon | -           | hypothetical protein                                                      |
|     | 0730-16_genome_1-orf3326 | Stop codon | <i>pgtB</i> | histidine kinase                                                          |
| 85  | 0730-16_genome_1-orf3398 | Stop codon | <i>yjaB</i> | acetyltransferase                                                         |
|     | 0730-16_genome_1-orf3399 | Stop codon | <i>yjaB</i> | acetyltransferase                                                         |
| 86  | 0730-16_genome_1-orf3474 | Stop codon | <i>yjcO</i> | hypothetical protein                                                      |
|     | 0730-16_genome_1-orf3475 | Stop codon | <i>yjcO</i> | hypothetical protein                                                      |
| 87  | 0730-16_genome_1-orf3482 | Stop codon | <i>fdhF</i> | formate dehydrogenase H, subunit of formate hydrogenlyase complex         |
| 88  | 0730-16_genome_1-orf3483 | Stop codon | <i>yjcP</i> | multidrug RND transporter                                                 |
| 89  | 0730-16_genome_1-orf3484 | Stop codon | <i>mdtP</i> | multidrug RND transporter                                                 |
| 90  | 0730-16_genome_1-orf3488 | Stop codon | -           | 6-phospho-beta-glucosidase                                                |
| 91  | 0730-16_genome_1-orf3489 | Insertion  | -           | transcription antitermination protein BlgG                                |
|     | 0730-16_genome_1-orf3491 | Insertion  | -           | transcription antitermination protein BlgG                                |
| 92  | 0730-16_genome_1-orf3534 | Stop codon | -           | isovaleryl CoA dehydrogenase                                              |
|     | 0730-16_genome_1-orf3535 | Stop codon | <i>aidB</i> | isovaleryl CoA dehydrogenase                                              |
| 93  | 0730-16_genome_1-orf3537 | Stop codon | <i>yjfM</i> | membrane protein                                                          |
|     | 0730-16_genome_1-orf3538 | Stop codon | <i>yjfM</i> | hypothetical protein                                                      |
|     | 0730-16_genome_1-orf3539 | Stop codon | <i>yjfL</i> | hypothetical protein                                                      |
| 94  | 0730-16_genome_1-orf3602 | Insertion  | <i>melB</i> | sugar:sodium symporter                                                    |
|     | 0730-16_genome_1-orf3604 | Insertion  | <i>melB</i> | sugar:sodium symporter                                                    |
| 95  | 0730-16_genome_1-orf3617 | Stop codon | -           | putative alkylphosphonate uptake protein in phosphonate metabolism        |
| 96  | 0730-16_genome_1-orf3670 | Stop codon | <i>ygjJ</i> | hypothetical protein                                                      |
|     | 0730-16_genome_1-orf3671 | Stop codon | <i>ygjJ</i> | hypothetical protein                                                      |
| 97  | 0730-16_genome_1-orf3672 | Stop codon | <i>ygjK</i> | alpha-glucosidase                                                         |
|     | 0730-16_genome_1-orf3673 | Stop codon | <i>ygjK</i> | alpha-glucosidase                                                         |
| 98  | 0730-16_genome_1-orf3686 | Stop codon | <i>yqjA</i> | inner membrane YqjA domain protein                                        |
| 99  | 0730-16_genome_1-orf3722 | Stop codon | <i>agaC</i> | PTS N-acetylgalactosamine transporter subunit IIC                         |
| 100 | 0730-16_genome_1-orf3741 | Insertion  | <i>yjgN</i> | membrane protein, partial                                                 |
|     | 0730-16_genome_1-orf3743 | Insertion  | <i>yjgN</i> | membrane protein                                                          |
| 101 | 0730-16_genome_1-orf3749 | Stop codon | -           | 30S ribosomal protein S21                                                 |
| 102 | 0730-16_genome_1-orf3760 | Stop codon | <i>yqiJ</i> | inner membrane protein yqiJ                                               |
| 103 | 0730-16_genome_1-orf3790 | Stop codon | -           | ABC transporter substrate-binding protein                                 |
| 104 | 0730-16_genome_1-orf3818 | Stop codon | <i>pitB</i> | phosphate transporter PitA                                                |
|     | 0730-16_genome_1-orf3819 | Stop codon | -           | inorganic phosphate transporter                                           |
| 105 | 0730-16_genome_1-orf3839 | Stop codon | -           | hypothetical protein                                                      |

**Table S7 Pseudogenes with known functions identified in the genome of *E. marmotae* HT073016**

|     |                          |            |             |                                                                                               |
|-----|--------------------------|------------|-------------|-----------------------------------------------------------------------------------------------|
|     | 0730-16_genome_1-orf3840 | Stop codon | -           | type VI secretion protein ImpK                                                                |
| 106 | 0730-16_genome_1-orf3875 | Stop codon | <i>galP</i> | D-galactose transporter                                                                       |
|     | 0730-16_genome_1-orf3876 | Stop codon | <i>galP</i> | galactose-proton symporter                                                                    |
| 107 | 0730-16_genome_1-orf3944 | Stop codon | <i>ssnA</i> | protein SsnA                                                                                  |
|     | 0730-16_genome_1-orf3945 | Stop codon | -           | protein SsnA                                                                                  |
| 108 | 0730-16_genome_1-orf3949 | Stop codon | <i>yqeB</i> | hypothetical protein                                                                          |
|     | 0730-16_genome_1-orf3950 | Stop codon | <i>yqeB</i> | hypothetical protein                                                                          |
| 109 | 0730-16_genome_1-orf3967 | Stop codon | -           | bipartite regulatory protein                                                                  |
|     | 0730-16_genome_1-orf3968 | Stop codon | <i>yqeH</i> | bipartite regulatory protein                                                                  |
| 110 | 0730-16_genome_1-orf4076 | Stop codon | <i>ispF</i> | 2-C-methyl-D-erythritol 2,4-cyclodiphosphate synthase                                         |
| 111 | 0730-16_genome_1-orf4089 | Stop codon | <i>pphB</i> | serine/threonine-protein phosphatase 2                                                        |
|     | 0730-16_genome_1-orf4090 | Stop codon | <i>pphB</i> | serine/threonine-protein phosphatase 2                                                        |
| 112 | 0730-16_genome_1-orf4165 | Stop codon | <i>ygaF</i> | L-2-hydroxyglutarate oxidase LhgO                                                             |
|     | 0730-16_genome_1-orf4166 | Stop codon | -           | L-2-hydroxyglutarate oxidase LhgO                                                             |
| 113 | 0730-16_genome_1-orf4173 | Stop codon | <i>ppnK</i> | inorganic polyphosphate/ATP-NAD kinase                                                        |
| 114 | 0730-16_genome_1-orf4214 | Stop codon | <i>rnc</i>  | rnc-sfGFP                                                                                     |
| 115 | 0730-16_genome_1-orf4219 | Stop codon | <i>yfhL</i> | Sialic acid utilization regulator, RpiR family                                                |
| 116 | 0730-16_genome_1-orf4233 | Stop codon | -           | hypothetical protein                                                                          |
|     | 0730-16_genome_1-orf4234 | Stop codon | -           | hypothetical protein                                                                          |
| 117 | 0730-16_genome_1-orf4236 | Stop codon | -           | fused putative sugar transporter subunits of ABC superfamily: ATP-binding components, partial |
|     | 0730-16_genome_1-orf4237 | Stop codon | <i>yphE</i> | ABC transporter ATP-binding protein                                                           |
| 118 | 0730-16_genome_1-orf4242 | Stop codon | <i>hcaT</i> | 3-phenylpropionic acid MFS transporter                                                        |
|     | 0730-16_genome_1-orf4243 | Stop codon | -           | 3-phenylpropionic acid MFS transporter                                                        |
| 119 | 0730-16_genome_1-orf4283 | Stop codon | <i>upp</i>  | cytosine deaminase:uracil phosphoribosyltransferase fusion protein                            |
| 120 | 0730-16_genome_1-orf4346 | Stop codon | -           | 6-phospho-beta-glucosidase                                                                    |
|     | 0730-16_genome_1-orf4347 | Stop codon | -           | transcription antitermination protein BlgG                                                    |
